# Supplementary material for: Arsinocarbyne reactivity
Source: Royal Society of Chemistry journal article supplement (doi:10.1039/d1dt03790k), 2021-12-22
Supplement: d1dt03790k1.pdf [file d1dt03790k1.pdf]

## Electronic Supporting information for:

### Arsinocarbyne Reactivity

Benjamin J. Frogley and Anthony F. Hill†

Research School of Chemistry, Australian National University, Canberra, Australian Capital Territory, ACT 2601, Australia.

† Corresponding author. E-mail: a.hill@anu.edu.au

#### 1 [W(=CAsMe<sub>2</sub>)(CO)<sub>2</sub>(Tp)]

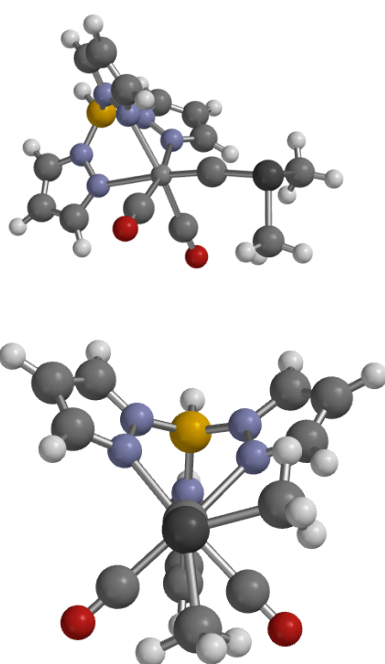

Figure S1. Optimised Geometry for [W(=CAsMe<sub>2</sub>)(CO)<sub>2</sub>(Tp)]

#### Thermodynamic Properties at 298.15 K

Zero Point Energy: 748.90 kJ/mol (ZPE)  
 Temperature Correction: 57.91 kJ/mol  
 (vibration + gas law + rotation + translation)  
 Enthalpy Correction: 806.81 kJ/mol  
 (ZPE + temperature correction)  
 Enthalpy: -3349.891257 au  
 (Electronic Energy + Enthalpy Correction)  
 Entropy: 618.54 J/mol.K  
 Gibbs Energy: -3349.961497 au  
 (Enthalpy - T\*Entropy)  
 C<sub>v</sub>: 403.94 J/mol.K

#### Cartesian Coordinates for [W(=CAsMe<sub>2</sub>)(CO)<sub>2</sub>(Tp)]

| Atom | x         | y         | z         |
|------|-----------|-----------|-----------|
| W    | -0.721020 | -0.300532 | -0.277070 |
| O    | -2.818635 | -2.662858 | -0.373757 |
| O    | -3.029818 | 1.837638  | -0.469724 |
| N    | -0.844148 | -0.281819 | 2.070263  |
| N    | 0.283735  | -0.206030 | 2.809075  |
| N    | 0.826213  | 1.239580  | 0.183316  |
| N    | 1.695247  | 1.112487  | 1.209183  |
| N    | 1.004398  | -1.635536 | 0.217192  |
| N    | 1.851113  | -1.375599 | 1.237247  |
| C    | -0.787960 | -0.321046 | -2.078205 |
| C    | -2.054545 | -1.797945 | -0.325074 |
| C    | -2.192022 | 1.044307  | -0.381573 |
| C    | -1.865968 | -0.339172 | 2.924552  |
| C    | -1.401453 | -0.299987 | 4.242395  |
| H    | -1.981019 | -0.328666 | 5.151938  |
| C    | -0.025852 | -0.214744 | 4.116717  |
| C    | 1.100151  | 2.397495  | -0.420172 |
| C    | 2.164832  | 3.037069  | 0.218989  |
| H    | 2.617184  | 3.983731  | -0.032110 |
| C    | 2.507997  | 2.181573  | 1.251005  |
| C    | 1.427641  | -2.757852 | -0.366042 |
| C    | 2.568389  | -3.239824 | 0.280678  |
| H    | 3.141605  | -4.122618 | 0.044066  |
| C    | 2.798342  | -2.327293 | 1.294920  |
| B    | 1.663309  | -0.129351 | 2.124793  |
| H    | 2.538289  | -0.064035 | 2.949019  |
| H    | -2.877094 | -0.404497 | 2.547764  |
| H    | 0.753995  | -0.159036 | 4.861973  |
| H    | 3.269110  | 2.256325  | 2.013413  |
| H    | 0.518684  | 2.699797  | -1.278879 |
| H    | 3.565308  | -2.285055 | 2.054022  |
| H    | 0.891066  | -3.150244 | -1.217451 |
| As   | -1.082093 | -0.334661 | -3.974931 |
| C    | -3.047319 | -0.119941 | -3.875888 |
| H    | -3.436825 | 0.120251  | -4.869137 |
| H    | -3.316229 | 0.673948  | -3.174648 |
| H    | -3.489453 | -1.060889 | -3.539413 |
| C    | -0.623600 | 1.570204  | -4.244977 |
| H    | 0.451224  | 1.700094  | -4.093723 |
| H    | -1.170867 | 2.201946  | -3.540555 |
| H    | -0.871912 | 1.862786  | -5.269191 |

2  $[W(\equiv CAsMe_3)(CO)_2(Tp)]^+$ 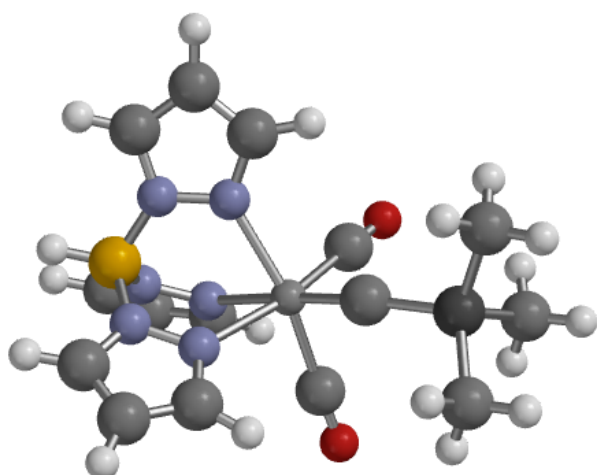Figure S2. Optimised Geometry for  $[W(\equiv CAsMe_3)(CO)_2(Tp)]^+$ **Thermodynamic Properties at 298.15 K**

|                                                |                     |
|------------------------------------------------|---------------------|
| Zero Point Energy:                             | 846.67 kJ/mol (ZPE) |
| Temperature Correction:                        | 62.37 kJ/mol        |
| (vibration + gas law + rotation + translation) |                     |
| Enthalpy Correction:                           | 909.04 kJ/mol       |
| (ZPE + temperature correction)                 |                     |
| Enthalpy:                                      | -3389.545056 au     |
| (Electronic Energy + Enthalpy Correction)      |                     |
| Entropy:                                       | 647.54 J/mol·K      |
| Gibbs Energy:                                  | -3389.618591 au     |
| (Enthalpy - T*Entropy)                         |                     |
| $C_V$ :                                        | 428.70 J/mol·K      |

**Cartesian Coordinates for  $[W(\equiv CAsMe_3)(CO)_2(Tp)]^+$** 

| Atom | x         | y         | z         |
|------|-----------|-----------|-----------|
| W    | 0.304336  | -0.042469 | 0.505579  |
| As   | 1.847023  | 2.988664  | -0.795235 |
| N    | -1.871317 | 0.013471  | 0.188125  |
| N    | -0.836544 | -2.515181 | -1.042959 |
| N    | 0.166456  | -1.608402 | -1.032795 |
| N    | -0.290166 | -1.800363 | 1.844801  |
| N    | -2.599002 | -1.112248 | 0.012932  |
| O    | 0.105720  | 1.744763  | 3.120896  |
| N    | -1.238802 | -2.670510 | 1.422408  |
| C    | 0.952382  | 1.425136  | -0.326446 |
| O    | 3.315008  | -0.788951 | 1.182234  |
| C    | 2.219566  | -0.534074 | 0.948771  |
| C    | 0.961568  | -1.892034 | -2.070778 |
| C    | 0.468160  | -2.991690 | -2.769336 |
| H    | 0.882544  | -3.459031 | -3.648712 |
| C    | 0.171933  | 1.081490  | 2.185250  |
| C    | -0.587170 | -3.360680 | 3.426316  |
| H    | -0.491781 | -3.926872 | 4.339411  |
| C    | -2.723735 | 1.043342  | 0.138185  |
| C    | -0.673935 | -3.356386 | -2.075538 |
| C    | -3.892394 | -0.793262 | -0.146542 |
| C    | -4.021117 | 0.584284  | -0.078223 |
| H    | -4.924468 | 1.166853  | -0.167058 |
| C    | 0.107754  | -2.212216 | 3.054459  |
| C    | 2.441404  | 2.911471  | -2.625475 |
| H    | 3.198495  | 2.130489  | -2.720238 |
| H    | 2.864918  | 3.875347  | -2.916734 |
| H    | 1.588252  | 2.671355  | -3.263003 |
| C    | -1.431122 | -3.613612 | 2.357063  |
| C    | 3.379662  | 3.231961  | 0.347009  |
| H    | 3.035814  | 3.317144  | 1.379972  |
| H    | 3.921324  | 4.135445  | 0.058274  |
| H    | 4.030299  | 2.360141  | 0.253297  |
| B    | -1.923352 | -2.497351 | 0.050000  |
| H    | -2.727647 | -3.368257 | -0.134139 |
| H    | -2.355443 | 2.051236  | 0.261146  |
| H    | -4.630361 | -1.567881 | -0.293219 |
| H    | -1.379557 | -4.156833 | -2.241804 |
| H    | 1.840119  | -1.291221 | -2.254212 |
| H    | 0.869458  | -1.663019 | 3.590251  |
| H    | -2.155275 | -4.399118 | 2.197921  |
| C    | 0.684944  | 4.511887  | -0.595030 |
| H    | 1.225165  | 5.425481  | -0.853590 |
| H    | 0.346868  | 4.561514  | 0.442084  |
| H    | -0.175984 | 4.390187  | -1.255318 |

### 3 *syn*-[W(≡CAsMe<sub>2</sub>AuCl)(CO)<sub>2</sub>(Tp)]

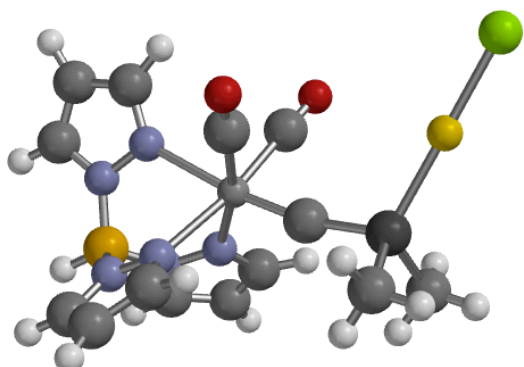

Figure S3. Optimised Geometry for [W(≡CAsMe<sub>2</sub>AuCl)(CO)<sub>2</sub>(Tp)]-*syn* conformer

#### Thermodynamic Properties at 298.15 K

|                                                |                     |
|------------------------------------------------|---------------------|
| Zero Point Energy:                             | 755.55 kJ/mol (ZPE) |
| Temperature Correction:                        | 65.07 kJ/mol        |
| (vibration + gas law + rotation + translation) |                     |
| Enthalpy Correction:                           | 820.62 kJ/mol       |
| (ZPE + temperature correction)                 |                     |
| Enthalpy:                                      | -3945.607947 au     |
| (Electronic Energy + Enthalpy Correction)      |                     |
| Entropy:                                       | 676.53 J/mol·K      |
| Gibbs Energy:                                  | -3945.684773 au     |
| (Enthalpy - T*Entropy)                         |                     |
| C <sub>v</sub> :                               | 450.51 J/mol·K      |

| Cartesian Coordinates for <i>syn</i> -[W(≡CAsMe <sub>2</sub> AuCl)(CO) <sub>2</sub> (Tp)] |           |           |           |
|-------------------------------------------------------------------------------------------|-----------|-----------|-----------|
| Atom                                                                                      | x         | y         | z         |
| W                                                                                         | -0.355696 | -0.545461 | 0.440716  |
| Au                                                                                        | -2.983419 | -4.294219 | -1.370855 |
| As                                                                                        | -1.852657 | -2.439971 | -2.327970 |
| Cl                                                                                        | -4.089387 | -6.108891 | -0.416309 |
| O                                                                                         | 0.349113  | -3.442829 | 1.503254  |
| N                                                                                         | 0.336718  | 2.536300  | 0.445624  |
| O                                                                                         | -3.287934 | -0.803136 | 1.600690  |
| N                                                                                         | -0.570482 | 1.627948  | 0.024469  |
| N                                                                                         | 0.312819  | 0.315164  | 2.501038  |
| C                                                                                         | -2.216392 | -0.713421 | 1.189534  |
| N                                                                                         | 1.763475  | -0.062940 | -0.021948 |
| N                                                                                         | 1.102262  | 1.411549  | 2.551132  |
| N                                                                                         | 2.354720  | 1.073546  | 0.406451  |
| C                                                                                         | 0.071061  | -0.049955 | 3.761507  |
| C                                                                                         | -1.520511 | 2.298263  | -0.631189 |
| C                                                                                         | 0.711022  | 0.817873  | 4.649049  |
| H                                                                                         | 0.706670  | 0.785462  | 5.727338  |
| C                                                                                         | -0.039116 | 3.766058  | 0.057331  |
| C                                                                                         | 1.354371  | 1.730880  | 3.831403  |
| C                                                                                         | -1.228781 | 3.663397  | -0.642357 |
| H                                                                                         | -1.801293 | 4.460189  | -1.090700 |
| C                                                                                         | 2.681312  | -0.748420 | -0.707025 |
| C                                                                                         | 3.889164  | -0.048926 | -0.730050 |
| H                                                                                         | 4.814739  | -0.339763 | -1.201628 |
| C                                                                                         | 3.632962  | 1.102148  | -0.005292 |
| B                                                                                         | 1.574824  | 2.099216  | 1.254224  |
| C                                                                                         | 0.088333  | -2.386965 | 1.127068  |
| C                                                                                         | -0.993083 | -1.354080 | -1.035443 |
| H                                                                                         | 2.267117  | 3.048432  | 1.510066  |
| H                                                                                         | 2.419979  | -1.702176 | -1.141541 |
| H                                                                                         | 4.267170  | 1.938216  | 0.249445  |
| H                                                                                         | 1.972545  | 2.584206  | 4.068788  |
| H                                                                                         | -0.546685 | -0.914052 | 3.962903  |
| H                                                                                         | -2.356112 | 1.761001  | -1.055202 |
| H                                                                                         | 0.565308  | 4.624457  | 0.310297  |
| C                                                                                         | -2.958387 | -1.175163 | -3.309065 |
| H                                                                                         | -2.344834 | -0.344524 | -3.665468 |
| H                                                                                         | -3.736837 | -0.804583 | -2.639286 |
| H                                                                                         | -3.426406 | -1.687744 | -4.152682 |
| C                                                                                         | -0.428598 | -2.855595 | -3.585562 |
| H                                                                                         | 0.295869  | -3.502480 | -3.087246 |
| H                                                                                         | 0.057100  | -1.933840 | -3.913534 |
| H                                                                                         | -0.852042 | -3.385172 | -4.441976 |

4 *anti*-[W(≡CAsMe<sub>2</sub>AuCl)(CO)<sub>2</sub>(Tp)]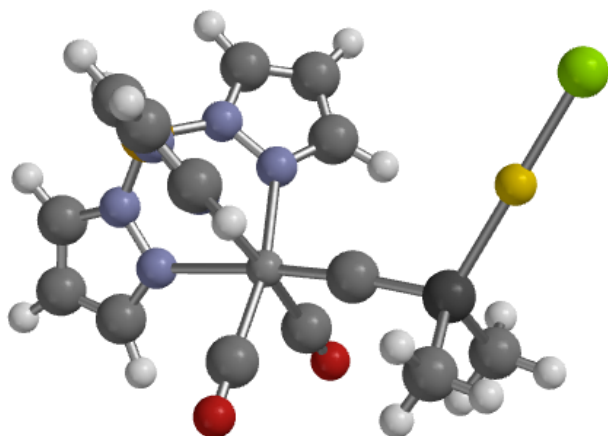Figure S4. Optimised Geometry for [W(≡CAsMe<sub>2</sub>AuCl)(CO)<sub>2</sub>(Tp)]-*anti* conformer

## Thermodynamic Properties at 298.15 K

|                                                |                                              |
|------------------------------------------------|----------------------------------------------|
| Zero Point Energy:                             | 755.59 kJ/mol (ZPE)                          |
| Temperature Correction:                        | 65.04 kJ/mol                                 |
| (vibration + gas law + rotation + translation) |                                              |
| Enthalpy Correction:                           | 820.63 kJ/mol (ZPE + temperature correction) |
| Enthalpy:                                      | -3945.609658 au                              |
| (Electronic Energy + Enthalpy Correction)      |                                              |
| Entropy:                                       | 676.55 J/mol•K                               |
| Gibbs Energy:                                  | -3945.686487 au                              |
| (Enthalpy - T*Entropy)                         |                                              |
| C <sub>v</sub> :                               | 442.16 J/mol•K                               |

| Cartesian                                           | Coordinates |           |           | for | <i>anti</i> - |
|-----------------------------------------------------|-------------|-----------|-----------|-----|---------------|
| [W(≡CAsMe <sub>2</sub> AuCl)(CO) <sub>2</sub> (Tp)] |             |           |           |     |               |
| Atom                                                | x           | y         | z         |     |               |
| W                                                   | -0.331180   | -0.488710 | 0.443959  |     |               |
| Au                                                  | -1.431563   | -1.286857 | -4.573369 |     |               |
| As                                                  | -1.766736   | -2.279336 | -2.442968 |     |               |
| Cl                                                  | -1.106149   | -0.314726 | -6.667272 |     |               |
| O                                                   | 0.360380    | -3.363707 | 1.571028  |     |               |
| N                                                   | 0.370413    | 2.587171  | 0.309808  |     |               |
| O                                                   | -3.253975   | -0.716399 | 1.636528  |     |               |
| N                                                   | -0.536552   | 1.660309  | -0.071315 |     |               |
| N                                                   | 0.371746    | 0.458493  | 2.456710  |     |               |
| C                                                   | -2.184171   | -0.627264 | 1.215184  |     |               |
| N                                                   | 1.777331    | -0.029459 | -0.074226 |     |               |
| N                                                   | 1.167104    | 1.550759  | 2.449865  |     |               |
| N                                                   | 2.380689    | 1.120610  | 0.299787  |     |               |
| C                                                   | 0.152646    | 0.143981  | 3.735433  |     |               |
| C                                                   | -1.466470   | 2.293774  | -0.790061 |     |               |
| C                                                   | 0.814387    | 1.040959  | 4.576160  |     |               |
| H                                                   | 0.830152    | 1.051668  | 5.654822  |     |               |
| C                                                   | 0.013281    | 3.791619  | -0.166397 |     |               |
| C                                                   | 1.446284    | 1.918122  | 3.710779  |     |               |
| C                                                   | -1.163930   | 3.653240  | -0.879988 |     |               |
| H                                                   | -1.717971   | 4.421399  | -1.396103 |     |               |
| C                                                   | 2.667699    | -0.725859 | -0.784811 |     |               |
| C                                                   | 3.868557    | -0.021262 | -0.879069 |     |               |
| H                                                   | 4.770959    | -0.315578 | -1.391654 |     |               |
| C                                                   | 3.637718    | 1.146362  | -0.172619 |     |               |
| B                                                   | 1.618624    | 2.183670  | 1.116952  |     |               |
| C                                                   | 0.111329    | -2.309284 | 1.175589  |     |               |
| C                                                   | -0.970506   | -1.311485 | -1.021706 |     |               |
| H                                                   | 2.317874    | 3.139640  | 1.323444  |     |               |
| H                                                   | 2.391717    | -1.686959 | -1.192750 |     |               |
| H                                                   | 4.276079    | 1.993874  | 0.028251  |     |               |
| H                                                   | 2.072211    | 2.777284  | 3.902320  |     |               |
| H                                                   | -0.466968   | -0.706945 | 3.982005  |     |               |
| H                                                   | -2.291774   | 1.736714  | -1.208281 |     |               |
| H                                                   | 0.623575    | 4.658933  | 0.037060  |     |               |
| C                                                   | -1.062134   | -4.077013 | -2.208845 |     |               |
| H                                                   | -1.228651   | -4.407692 | -1.181177 |     |               |
| H                                                   | 0.007644    | -4.065077 | -2.424916 |     |               |
| H                                                   | -1.562523   | -4.749927 | -2.909005 |     |               |
| C                                                   | -3.619038   | -2.443504 | -1.872413 |     |               |
| H                                                   | -4.070464   | -1.449694 | -1.867798 |     |               |
| H                                                   | -3.662061   | -2.872411 | -0.868754 |     |               |
| H                                                   | -4.155584   | -3.079432 | -2.580192 |     |               |

## 5 [WAu( $\mu$ -CAsMe<sub>2</sub>)Cl(CO)<sub>2</sub>(Tp)]

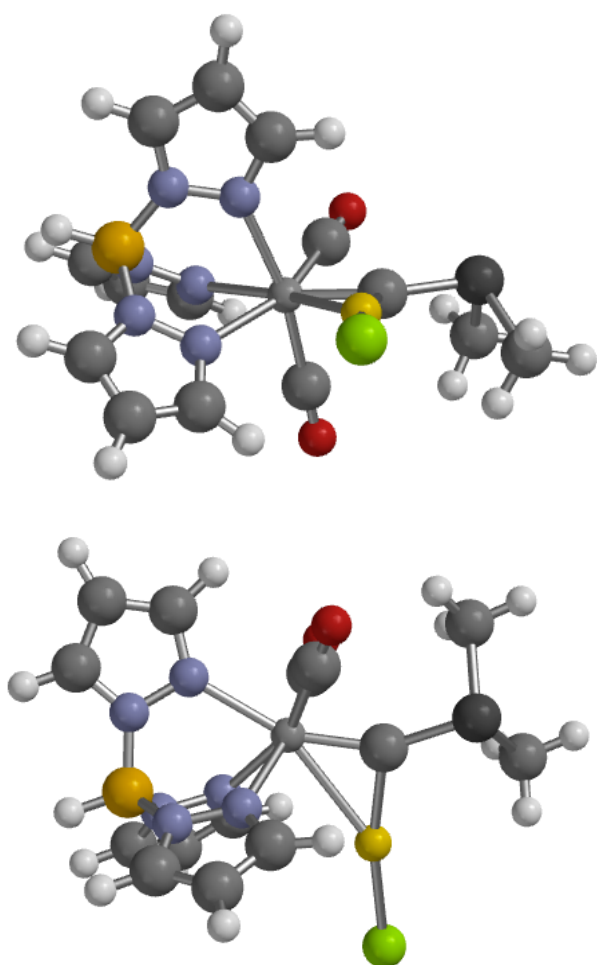

Figure S5. Optimised Geometry for [WAu( $\mu$ -CAsMe<sub>2</sub>)Cl(CO)<sub>2</sub>(Tp)]

### Thermodynamic Properties at 298.15 K

|                                                |                     |
|------------------------------------------------|---------------------|
| Zero Point Energy:                             | 755.66 kJ/mol (ZPE) |
| Temperature Correction:                        | 64.89 kJ/mol        |
| (vibration + gas law + rotation + translation) |                     |
| Enthalpy Correction:                           | 820.55 kJ/mol       |
| (ZPE + temperature correction)                 |                     |
| Enthalpy:                                      | -3945.614859 au     |
| (Electronic Energy + Enthalpy Correction)      |                     |
| Entropy:                                       | 672.93 J/mol·K      |
| Gibbs Energy:                                  | -3945.691276 au     |
| (Enthalpy - T*Entropy)                         |                     |
| C <sub>v</sub> :                               | 450.00 J/mol·K      |

### Cartesian Coordinates for [WAu( $\mu$ -CAsMe<sub>2</sub>)Cl(CO)<sub>2</sub>(Tp)]

| Atom | x         | y         | z         |
|------|-----------|-----------|-----------|
| W    | -0.285361 | -0.406648 | -0.004344 |
| Au   | 0.182494  | -0.596491 | -2.776530 |
| As   | -2.729835 | -2.275425 | -2.087869 |
| Cl   | 1.541936  | -0.116568 | -4.616140 |
| O    | 0.576361  | -3.314424 | 0.851896  |
| N    | 0.189552  | 2.689239  | 0.280351  |
| O    | -3.202918 | -0.643144 | 1.165749  |
| N    | -0.557897 | 1.766260  | -0.361493 |
| N    | 0.033020  | 0.257551  | 2.127371  |
| C    | -2.136518 | -0.576496 | 0.736293  |
| N    | 1.851049  | 0.196040  | -0.120610 |
| N    | 0.700357  | 1.407137  | 2.377335  |
| N    | 2.282246  | 1.345996  | 0.448322  |
| C    | -0.314493 | -0.262590 | 3.307865  |
| C    | -1.411656 | 2.425560  | -1.147197 |
| C    | 0.129767  | 0.557881  | 4.343771  |
| H    | 0.005890  | 0.409674  | 5.404962  |
| C    | -0.187910 | 3.921867  | -0.100722 |
| C    | 0.771607  | 1.604372  | 3.702698  |
| C    | -1.216540 | 3.802309  | -1.017733 |
| H    | -1.744149 | 4.594669  | -1.524723 |
| C    | 2.912203  | -0.380743 | -0.694308 |
| C    | 4.048358  | 0.402810  | -0.499745 |
| H    | 5.048992  | 0.211273  | -0.853249 |
| C    | 3.599904  | 1.487392  | 0.233395  |
| B    | 1.312900  | 2.249890  | 1.231707  |
| C    | 0.250704  | -2.252975 | 0.538739  |
| C    | -1.218355 | -1.266760 | -1.404511 |
| H    | 1.888459  | 3.202931  | 1.683400  |
| H    | 2.797900  | -1.311607 | -1.230625 |
| H    | 4.122840  | 2.349731  | 0.619495  |
| H    | 1.283037  | 2.470778  | 4.095299  |
| H    | -0.862352 | -1.193311 | 3.346286  |
| H    | -2.104824 | 1.874080  | -1.765735 |
| H    | 0.306792  | 4.791733  | 0.305012  |
| C    | -1.786257 | -3.337574 | -3.453336 |
| H    | -0.874105 | -3.781999 | -3.047933 |
| H    | -1.530352 | -2.702982 | -4.305379 |
| H    | -2.460121 | -4.129418 | -3.793759 |
| C    | -2.783856 | -3.668551 | -0.690662 |
| H    | -3.148624 | -3.243604 | 0.246738  |
| H    | -1.797981 | -4.112020 | -0.536235 |
| H    | -3.482264 | -4.445840 | -1.013845 |

6  $[\text{W}(\mu\text{-CAuClAsMe}_2)(\text{CO})_2(\text{Tp})]\text{-TS}$ 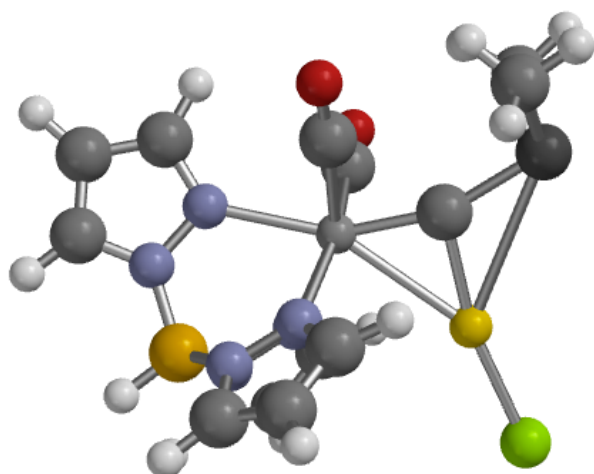Figure S6. Optimised Geometry for  $[\text{W}(\mu\text{-CAsMe)Cl(CO)}_2(\text{Tp})]$ 

## Thermodynamic Properties at 298.15 K

Zero Point Energy: 755.78 kJ/mol (ZPE)  
 Temperature Correction: 64.95 kJ/mol  
 (vibration + gas law + rotation + translation)  
 Enthalpy Correction: 820.73 kJ/mol  
 (ZPE + temperature correction)  
 Enthalpy: -3945.606617 au  
 (Electronic Energy + Enthalpy Correction)  
 Entropy: 672.49 J/mol·K  
 Gibbs Energy: -3945.682985 au  
 (Enthalpy - T\*Entropy)  
 $C_V$ : 441.55 J/mol·K  
 Single imaginary frequency  $i35\text{ cm}^{-1}$

Cartesian Coordinates for  
 $[\text{W}(\mu\text{-CAuClAsMe}_2)(\text{CO})_2(\text{Tp})]\text{-TS}$ 

| Atom | x         | y         | z         |
|------|-----------|-----------|-----------|
| W    | -0.122823 | -0.489274 | -0.216582 |
| As   | -2.191647 | -2.334581 | -2.800698 |
| O    | 0.754743  | -3.454947 | 0.415604  |
| N    | 0.345555  | 2.565689  | 0.371903  |
| O    | -3.015095 | -0.879526 | 0.974535  |
| N    | -0.394844 | 1.707693  | -0.362547 |
| N    | 0.157599  | -0.027587 | 1.987154  |
| C    | -1.969971 | -0.759005 | 0.506362  |
| N    | 2.020479  | 0.121512  | -0.203342 |
| N    | 0.800384  | 1.101787  | 2.361989  |
| N    | 2.435435  | 1.209782  | 0.486064  |
| C    | -0.207484 | -0.663434 | 3.104976  |
| C    | -1.220303 | 2.441469  | -1.112791 |
| C    | 0.200637  | 0.059809  | 4.224792  |
| H    | 0.055260  | -0.190694 | 5.263962  |
| C    | -0.010114 | 3.830403  | 0.085517  |
| C    | 0.839872  | 1.171941  | 3.701621  |
| C    | -1.015952 | 3.800190  | -0.863630 |
| H    | -1.520489 | 4.638217  | -1.318400 |
| C    | 3.103306  | -0.418251 | -0.773716 |
| C    | 4.236776  | 0.327678  | -0.455595 |
| H    | 5.251466  | 0.153974  | -0.777167 |
| C    | 3.763752  | 1.349863  | 0.348518  |
| B    | 1.441699  | 2.043632  | 1.313757  |
| C    | 0.422769  | -2.376689 | 0.180672  |
| C    | -0.983970 | -1.225839 | -1.723625 |
| H    | 2.000660  | 2.954058  | 1.863420  |
| H    | -1.899467 | 1.953015  | -1.796166 |
| H    | -0.742455 | -1.600440 | 3.043869  |
| H    | 1.325390  | 2.005659  | 4.187131  |
| H    | 4.275808  | 2.168250  | 0.832882  |
| H    | 3.006647  | -1.296628 | -1.395524 |
| H    | 0.481381  | 4.657613  | 0.575619  |
| Au   | 0.467602  | -0.383308 | -2.965484 |
| Cl   | 1.867922  | 0.325589  | -4.696547 |
| C    | -3.933234 | -1.911134 | -1.971006 |
| H    | -3.981354 | -2.191784 | -0.917986 |
| H    | -4.697116 | -2.464753 | -2.526003 |
| H    | -4.140862 | -0.842500 | -2.075134 |
| C    | -1.849035 | -4.026113 | -1.843311 |
| H    | -0.820012 | -4.344345 | -2.026767 |
| H    | -2.526355 | -4.787631 | -2.240506 |
| H    | -2.012560 | -3.919359 | -0.767822 |

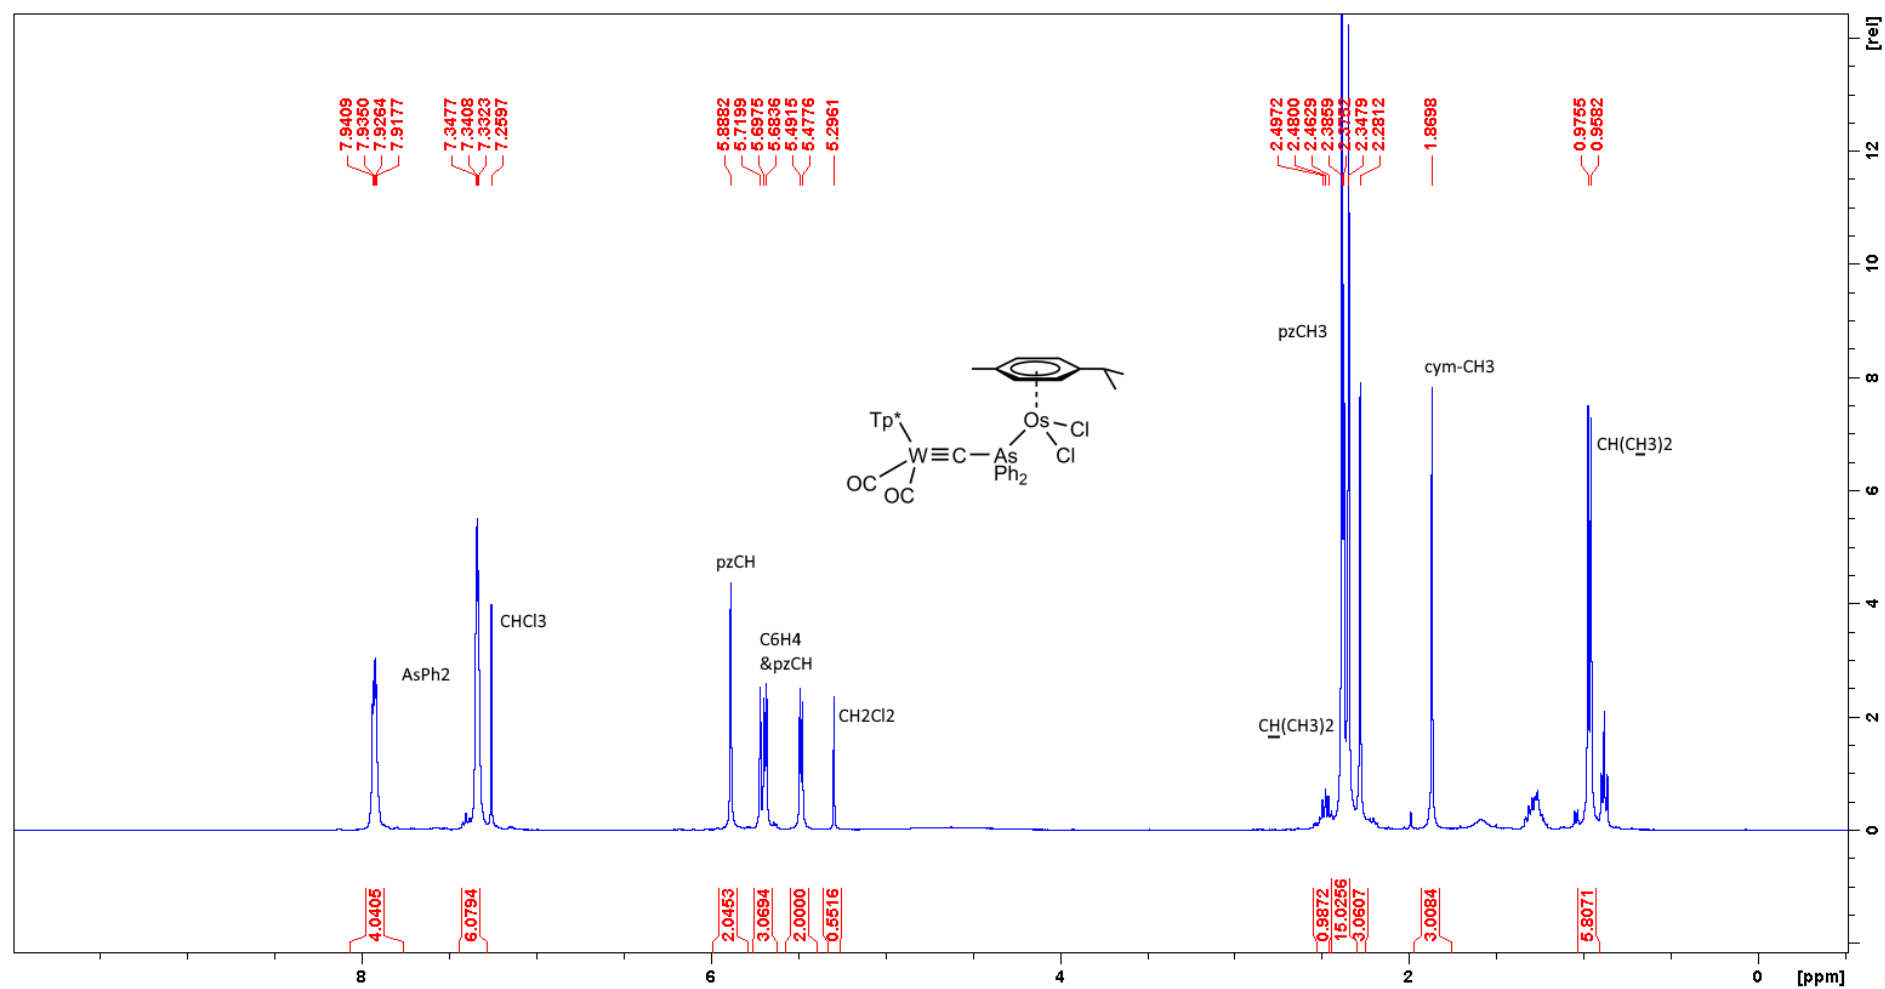

Figure S7.  $^1\text{H}$  NMR (400 MHz,  $\text{CDCl}_3$ , 25  $^\circ\text{C}$ ,  $\delta$ ) of  $[\text{W}(\equiv\text{CAsPh}_2\text{OsCl}_2(\text{p-cymene}))(\text{CO})_2(\text{Tp}^*)]$  (2).

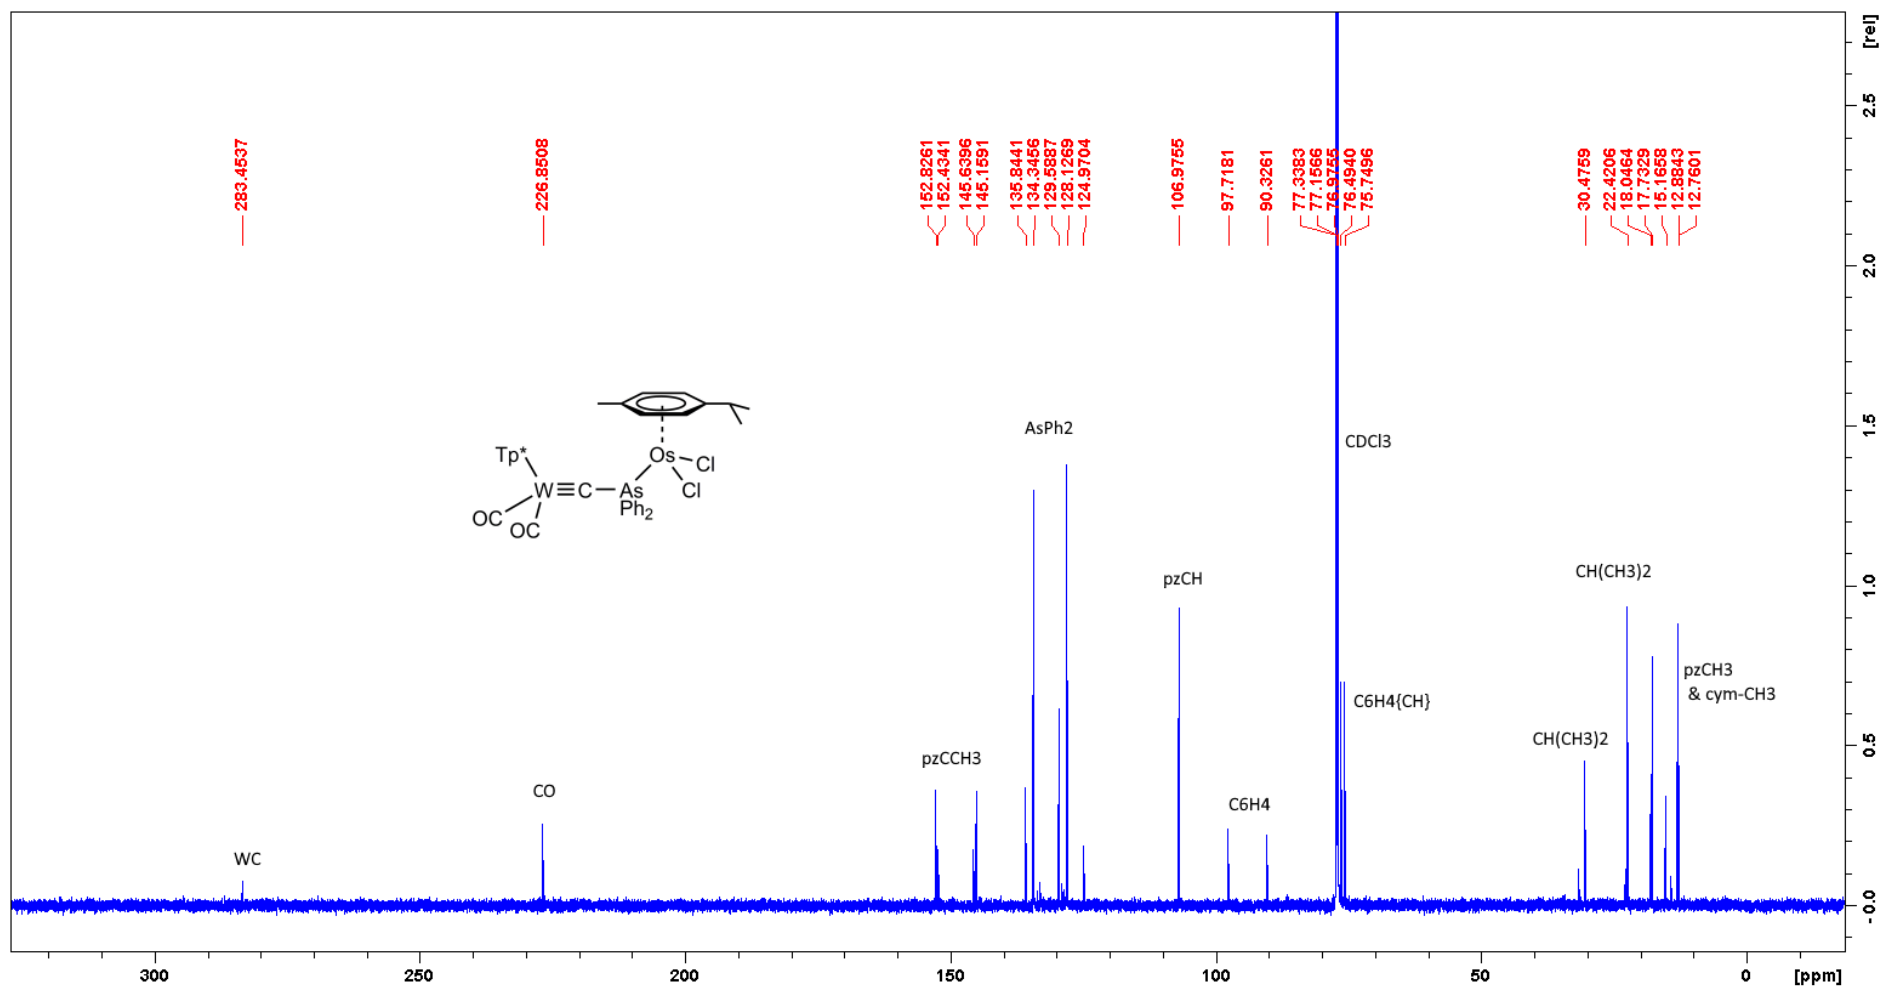



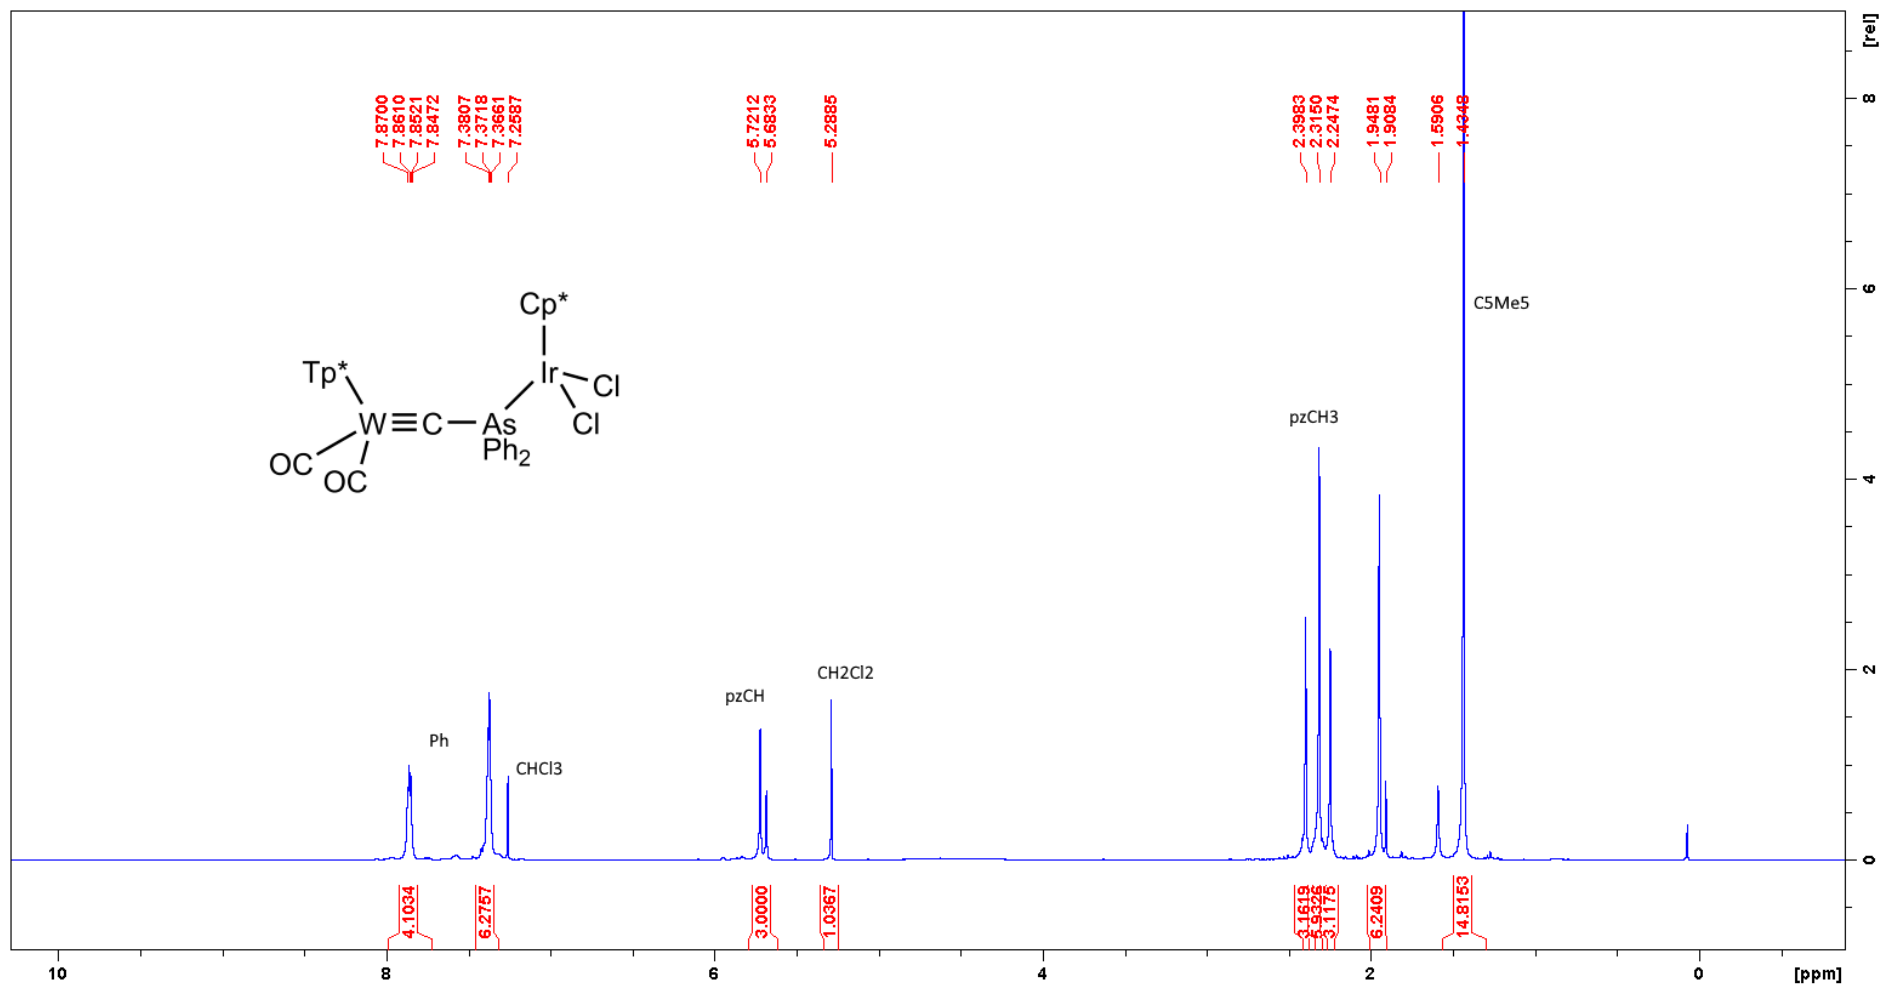

Figure S9.  $^1H$  NMR (400 MHz,  $CDCl_3$ , 25 °C,  $\delta$ ) of  $[W(=CAsPh_2IrCl_2Cp^*)(CO)_2(Tp^*)]$  (3).

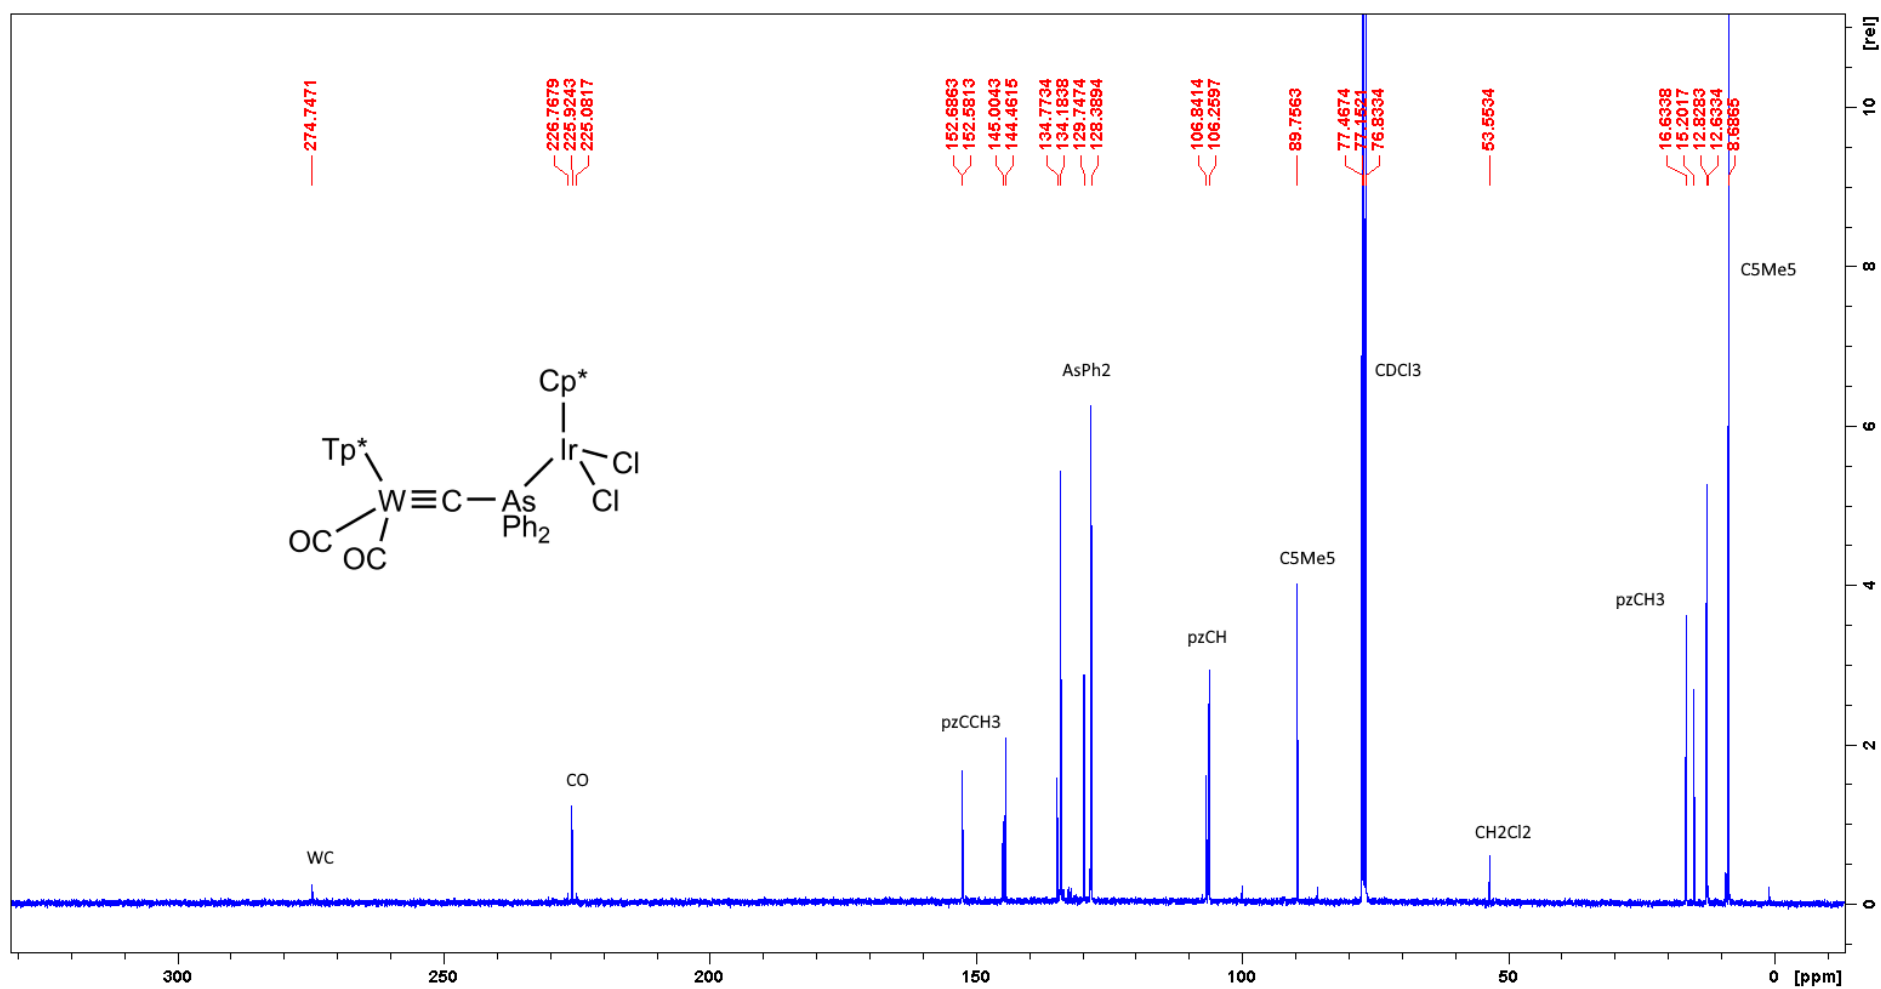

Figure S10.  $^{13}C$  NMR (101 MHz,  $CDCl_3$ , 25°C,  $\delta$ ) of  $[W(\equiv CAsPh_2IrCl_2Cp^*)(CO)_2(Tp^*)]$  (3).

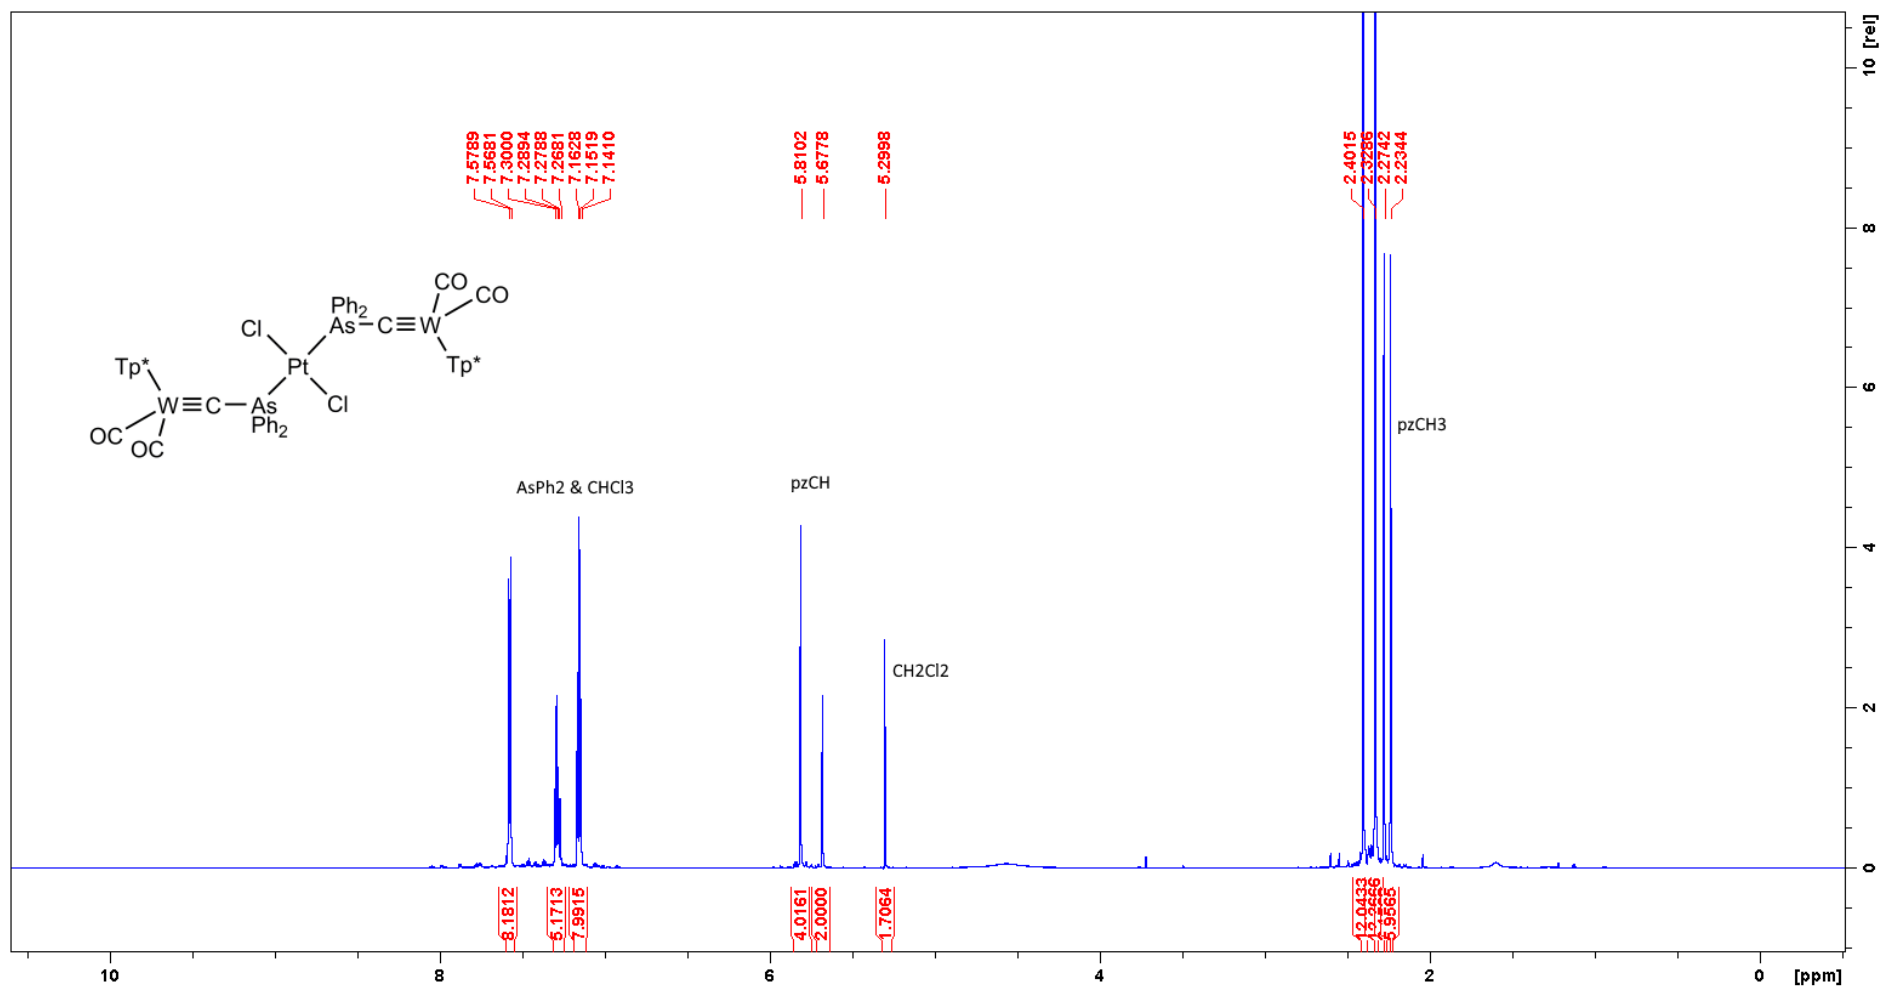

Figure S11.  $^1H$  NMR (700 MHz,  $CDCl_3$ , 25  $^\circ C$ ,  $\delta$ ) of  $[trans-((Tp^*)(CO)_2W\equiv CAsPh_2)_2PtCl_2]$  (4a).

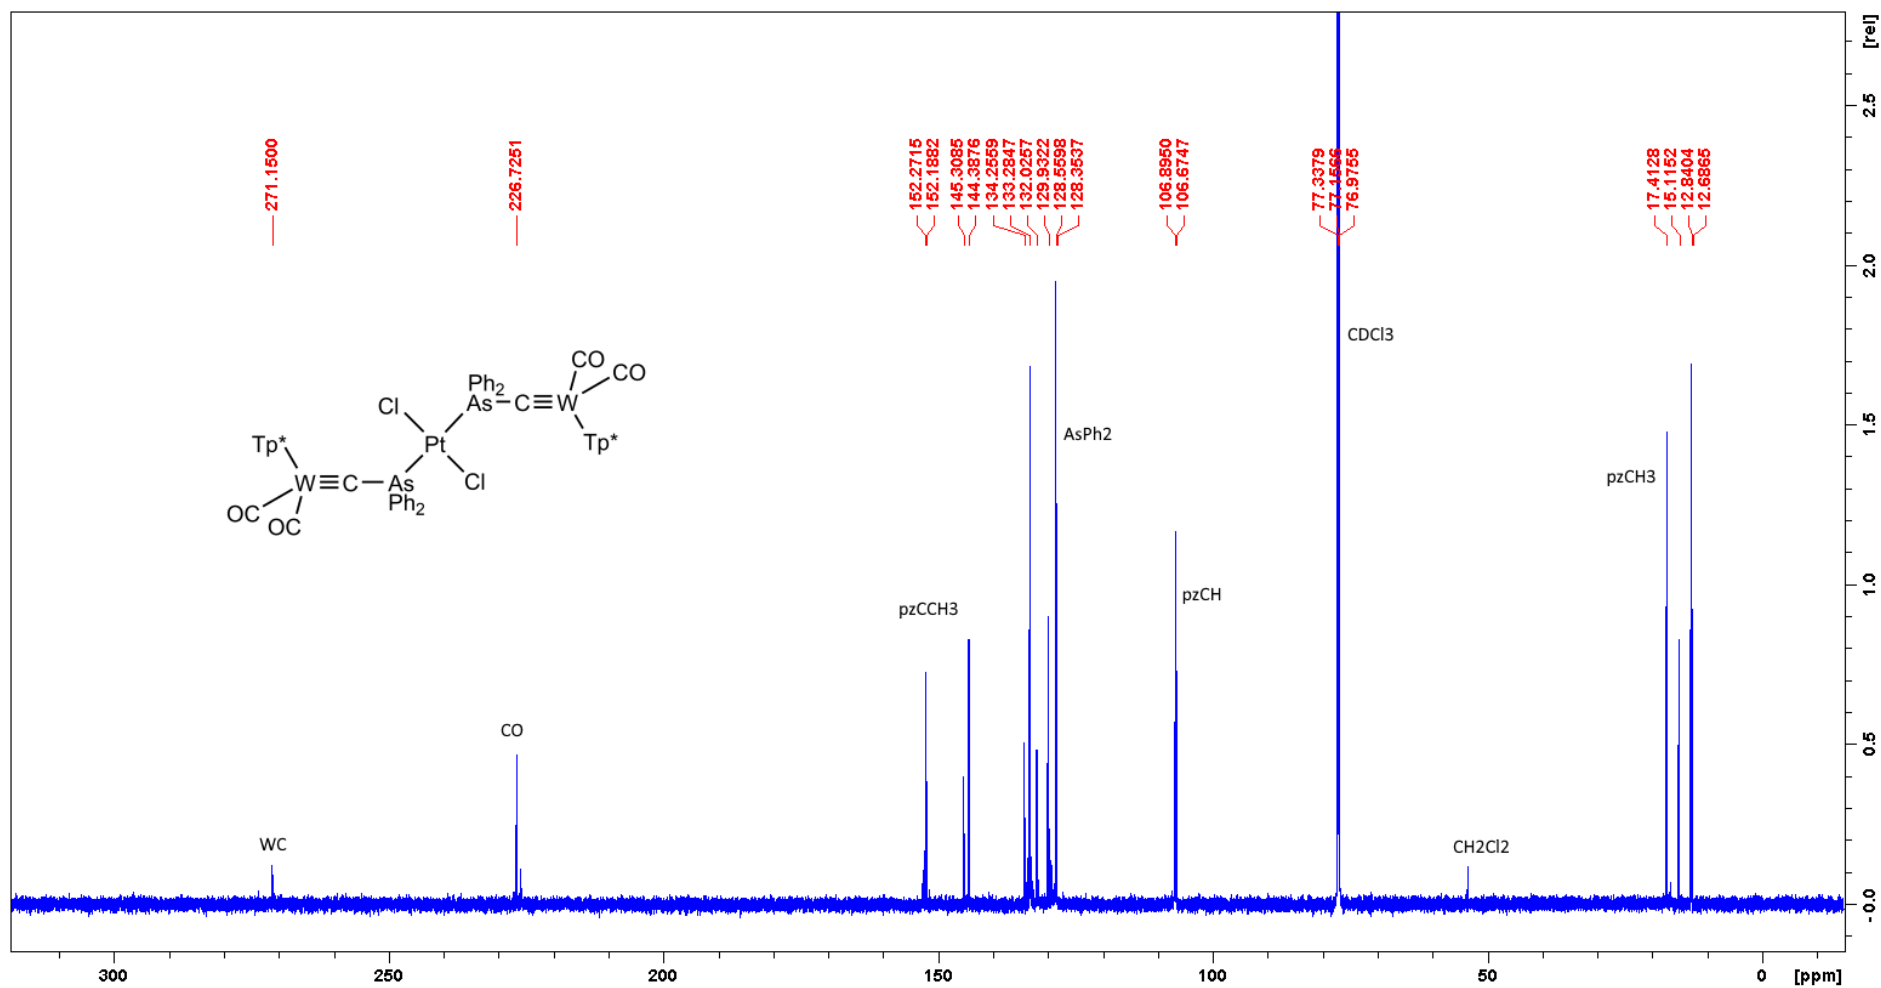

Figure S12.  $^{13}C$ { $^1H$ } NMR (176 MHz, CDCl<sub>3</sub>, 25°C,  $\delta$ ) of  $[trans-((Tp^*)(CO)_2W=CAsPh_2)_2PtCl_2]$  (4a).

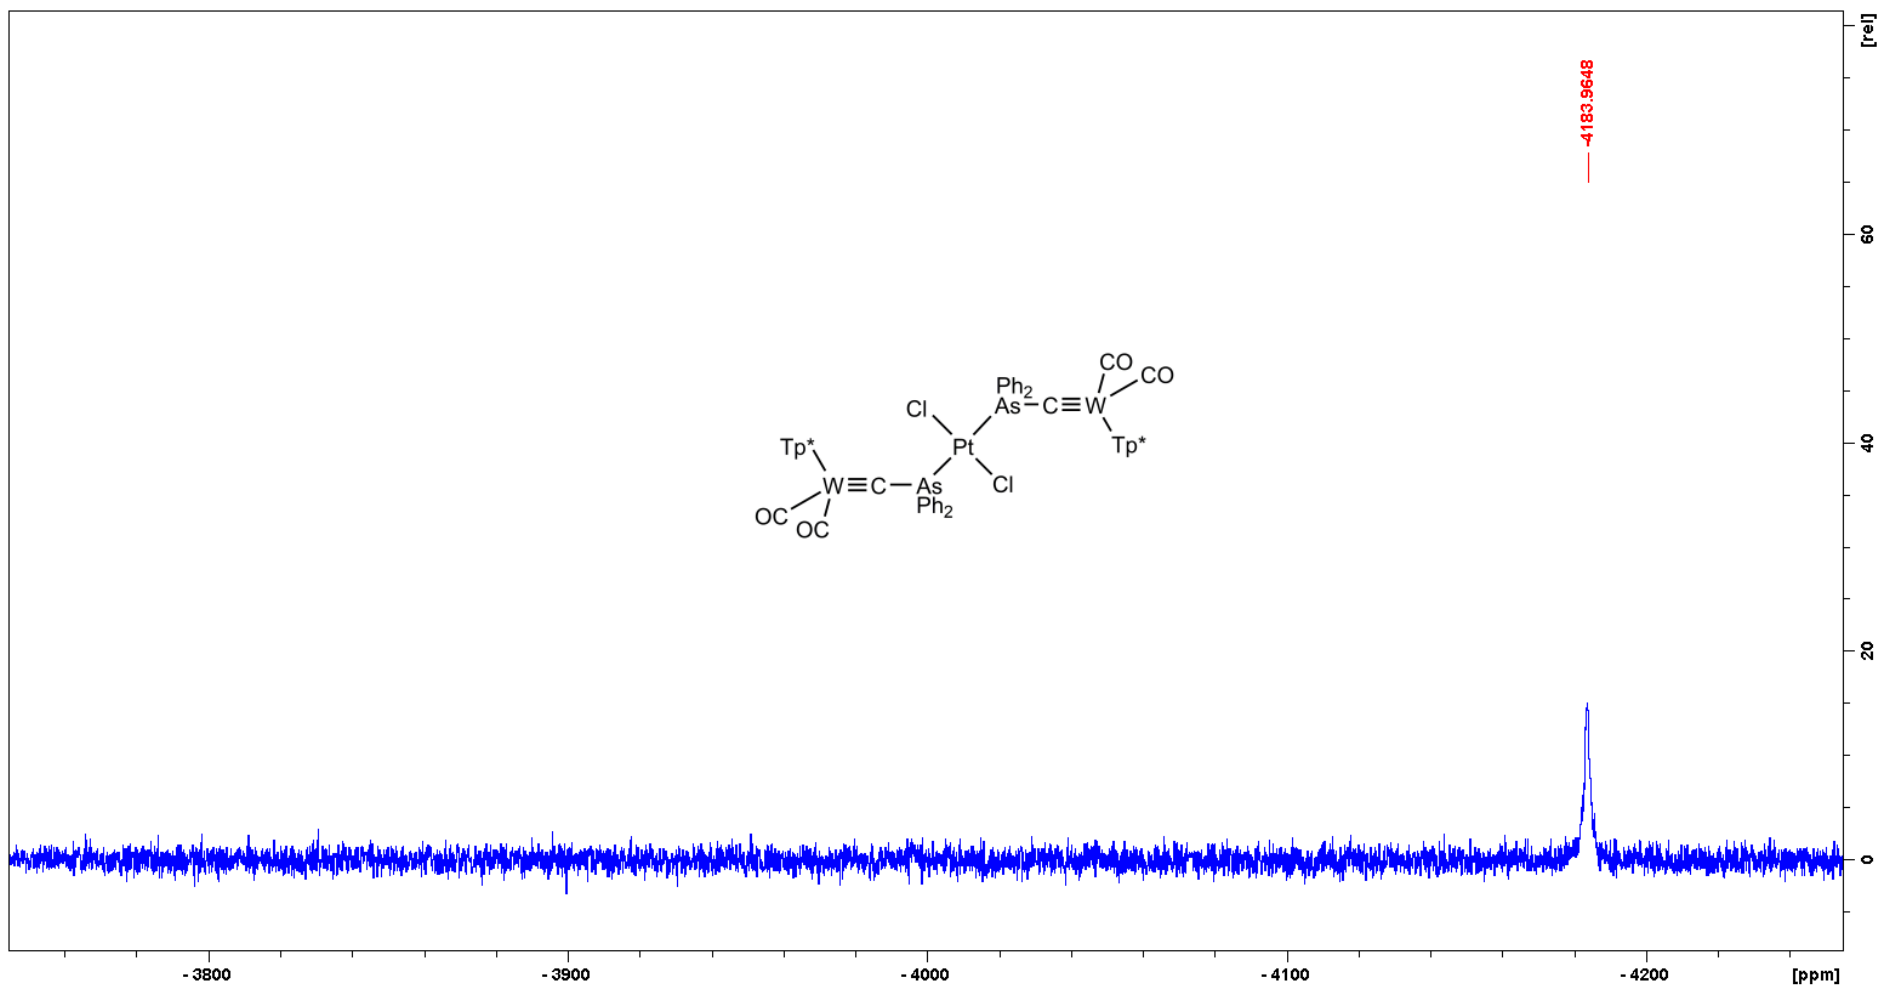

Figure S13.  $^{195}\text{Pt}\{^1\text{H}\}$  NMR (150 MHz,  $\text{CDCl}_3$ ,  $25^\circ\text{C}$ ,  $\delta$ ) of  $[\text{trans}-\{(\text{Tp}^*)(\text{CO})_2\text{W}\equiv\text{CAsPh}_2\}_2\text{PtCl}_2]$  (4a).

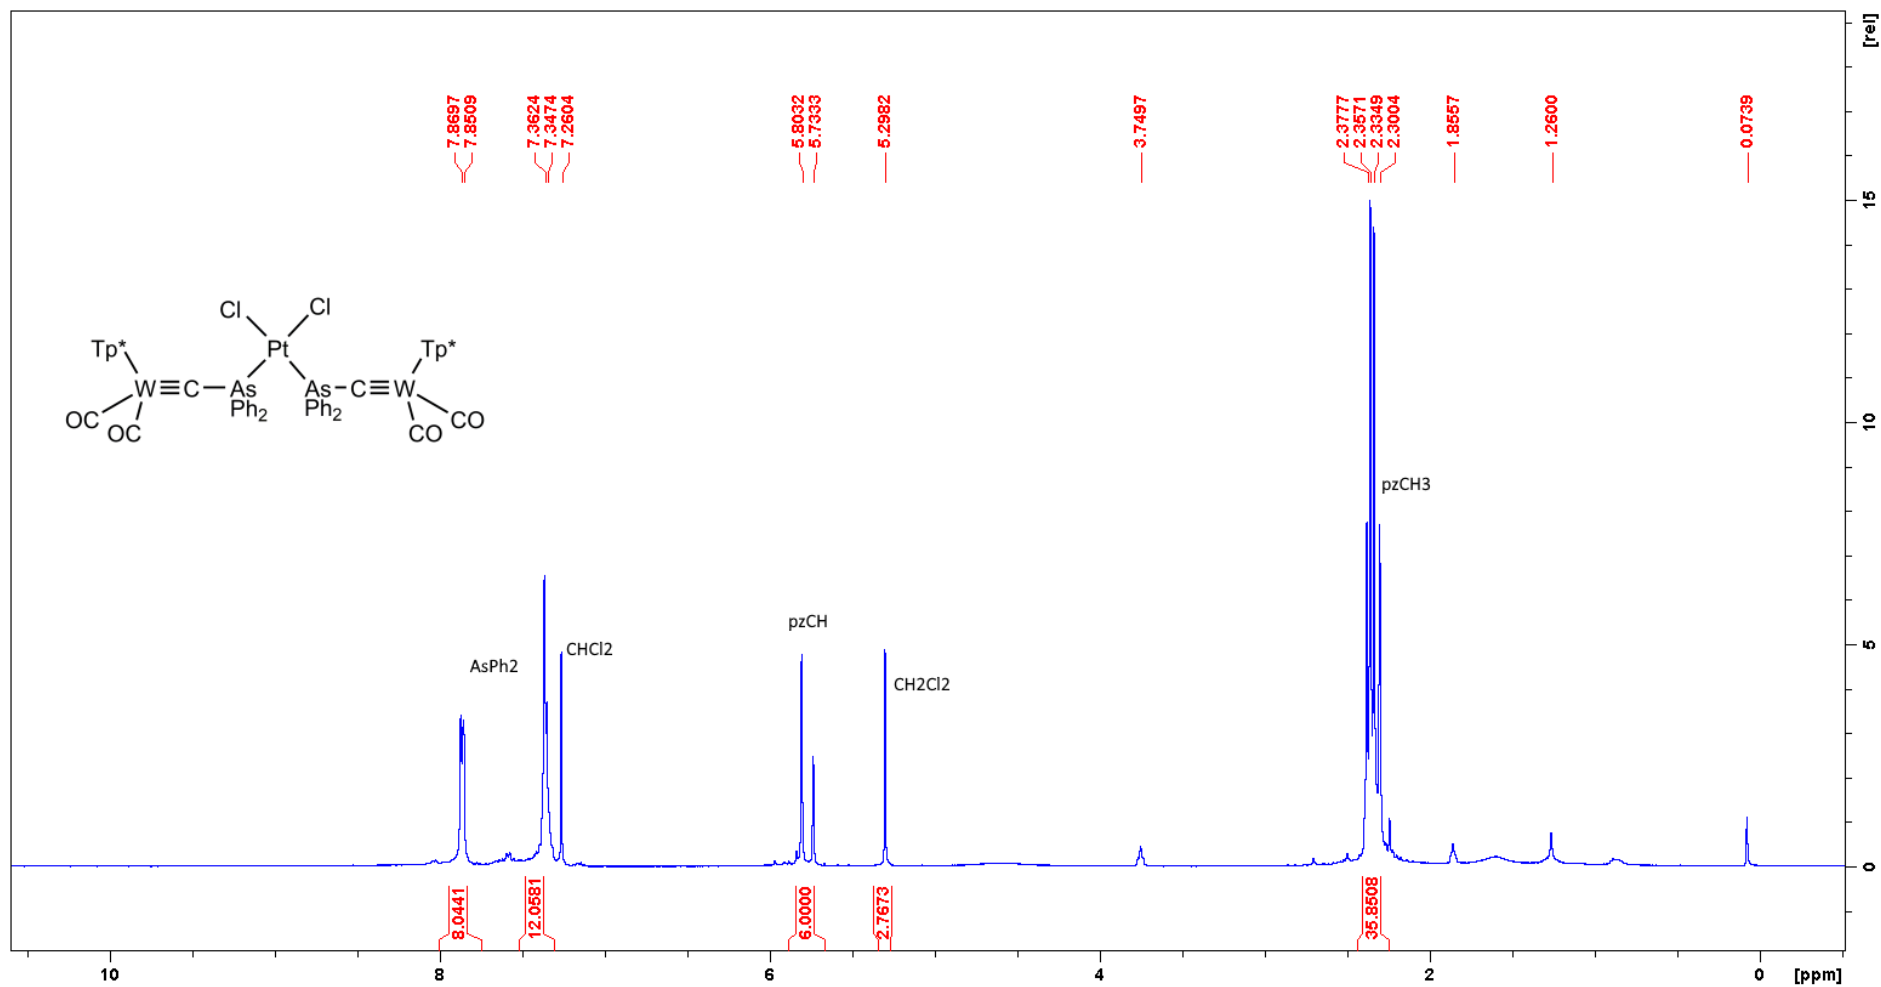

Figure S14.  $^1H$  NMR (700 MHz,  $CDCl_3$ , 25 °C,  $\delta$ ) of  $[cis-((Tp^*)(CO)_2W=CAsPh_2)_2PtCl_2]$  (4b).

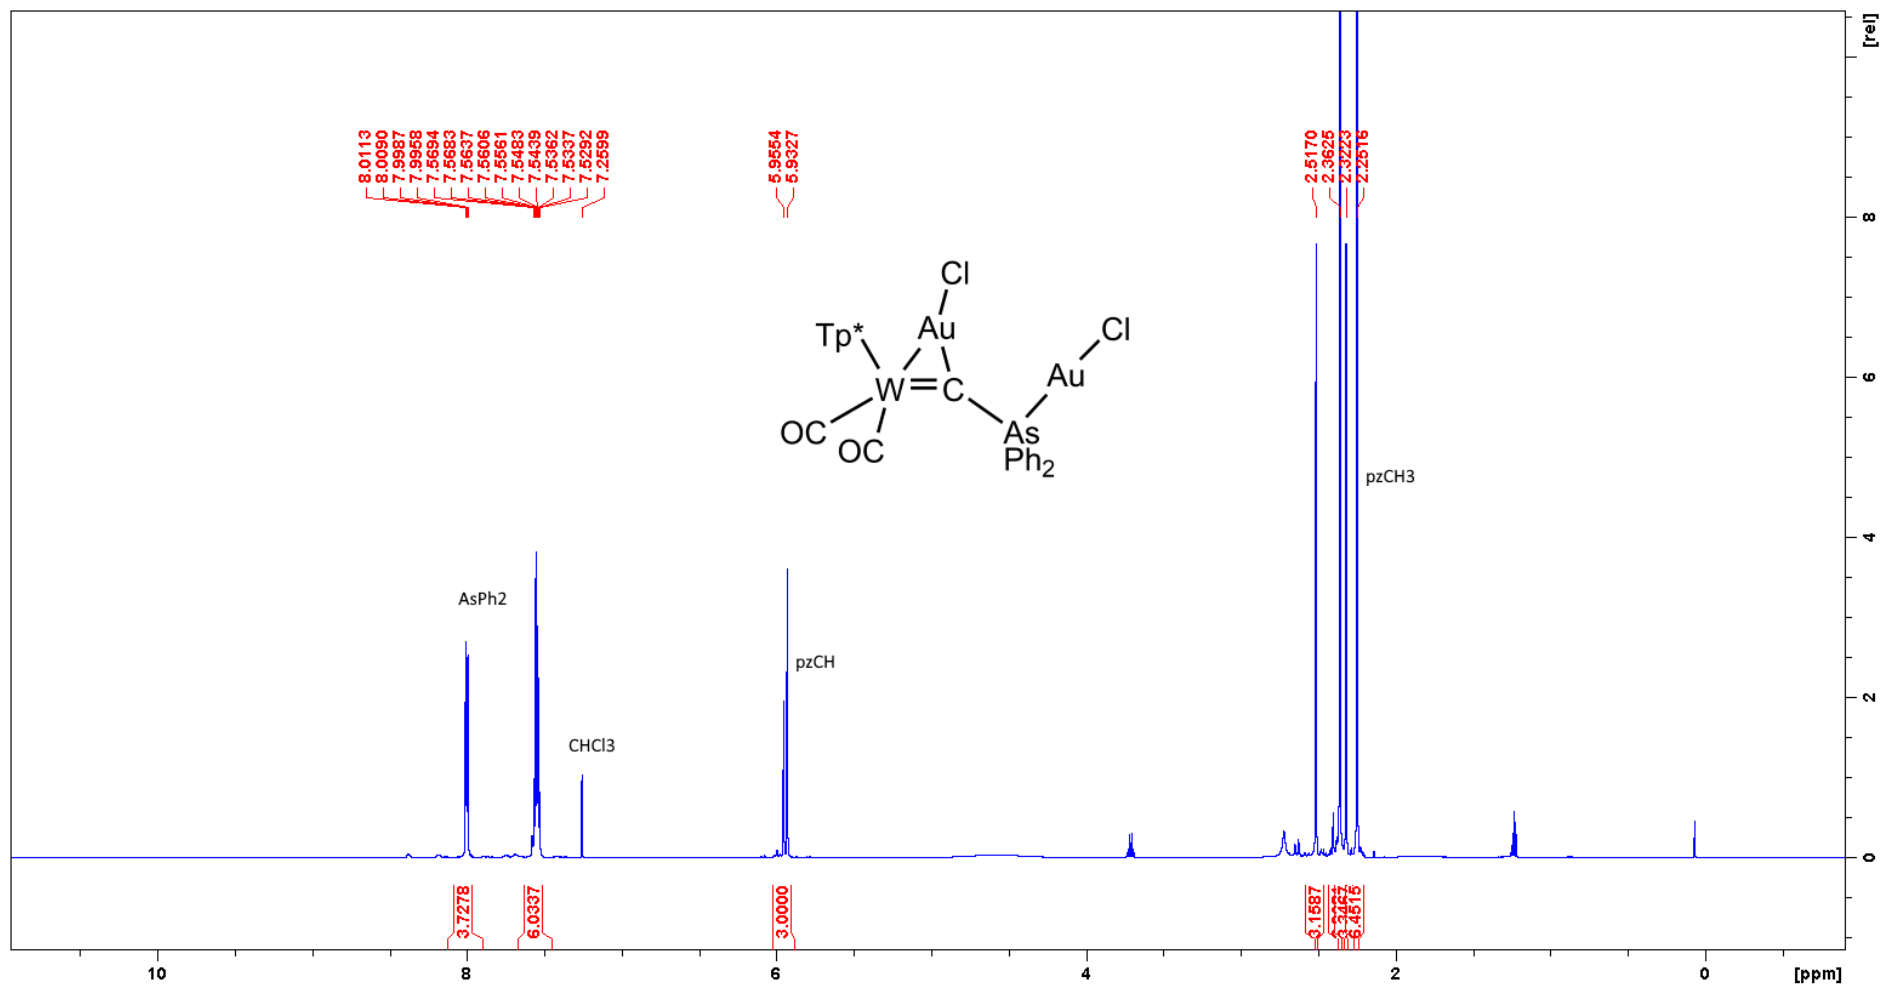

Figure S15.  $^1\text{H}$  NMR (600 MHz,  $\text{CDCl}_3$ , 25  $^\circ\text{C}$ ,  $\delta$ ) of  $[\text{WAu}(\mu\text{-CAsPh}_2\{\text{AuCl}\})\text{Cl}(\text{CO})_2(\text{Tp}^*)]$  (5).

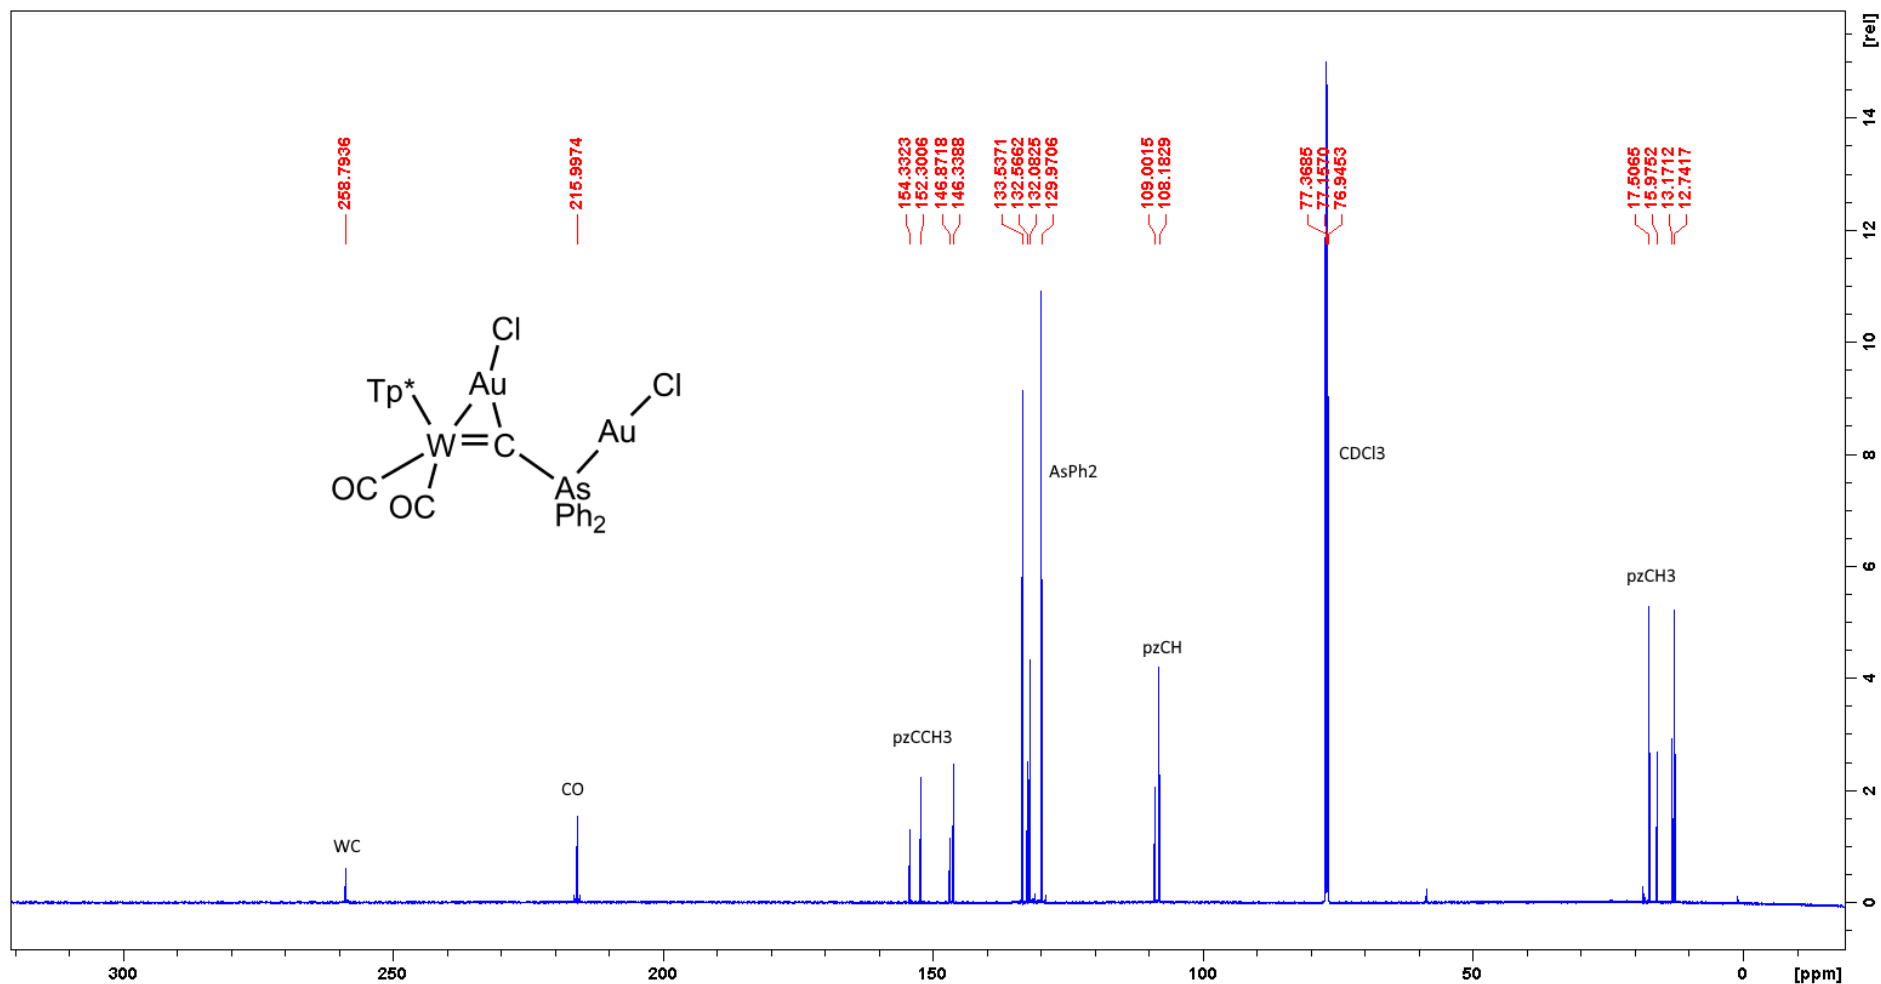

Figure S16.  $^{13}\text{C}\{^1\text{H}\}$  NMR (151 MHz,  $\text{CDCl}_3$ , 25°C,  $\delta$ ) of  $[\text{WAu}(\mu\text{-CAsPh}_2(\text{AuCl}))\text{Cl}(\text{CO})_2(\text{Tp}^*)]$  (5).



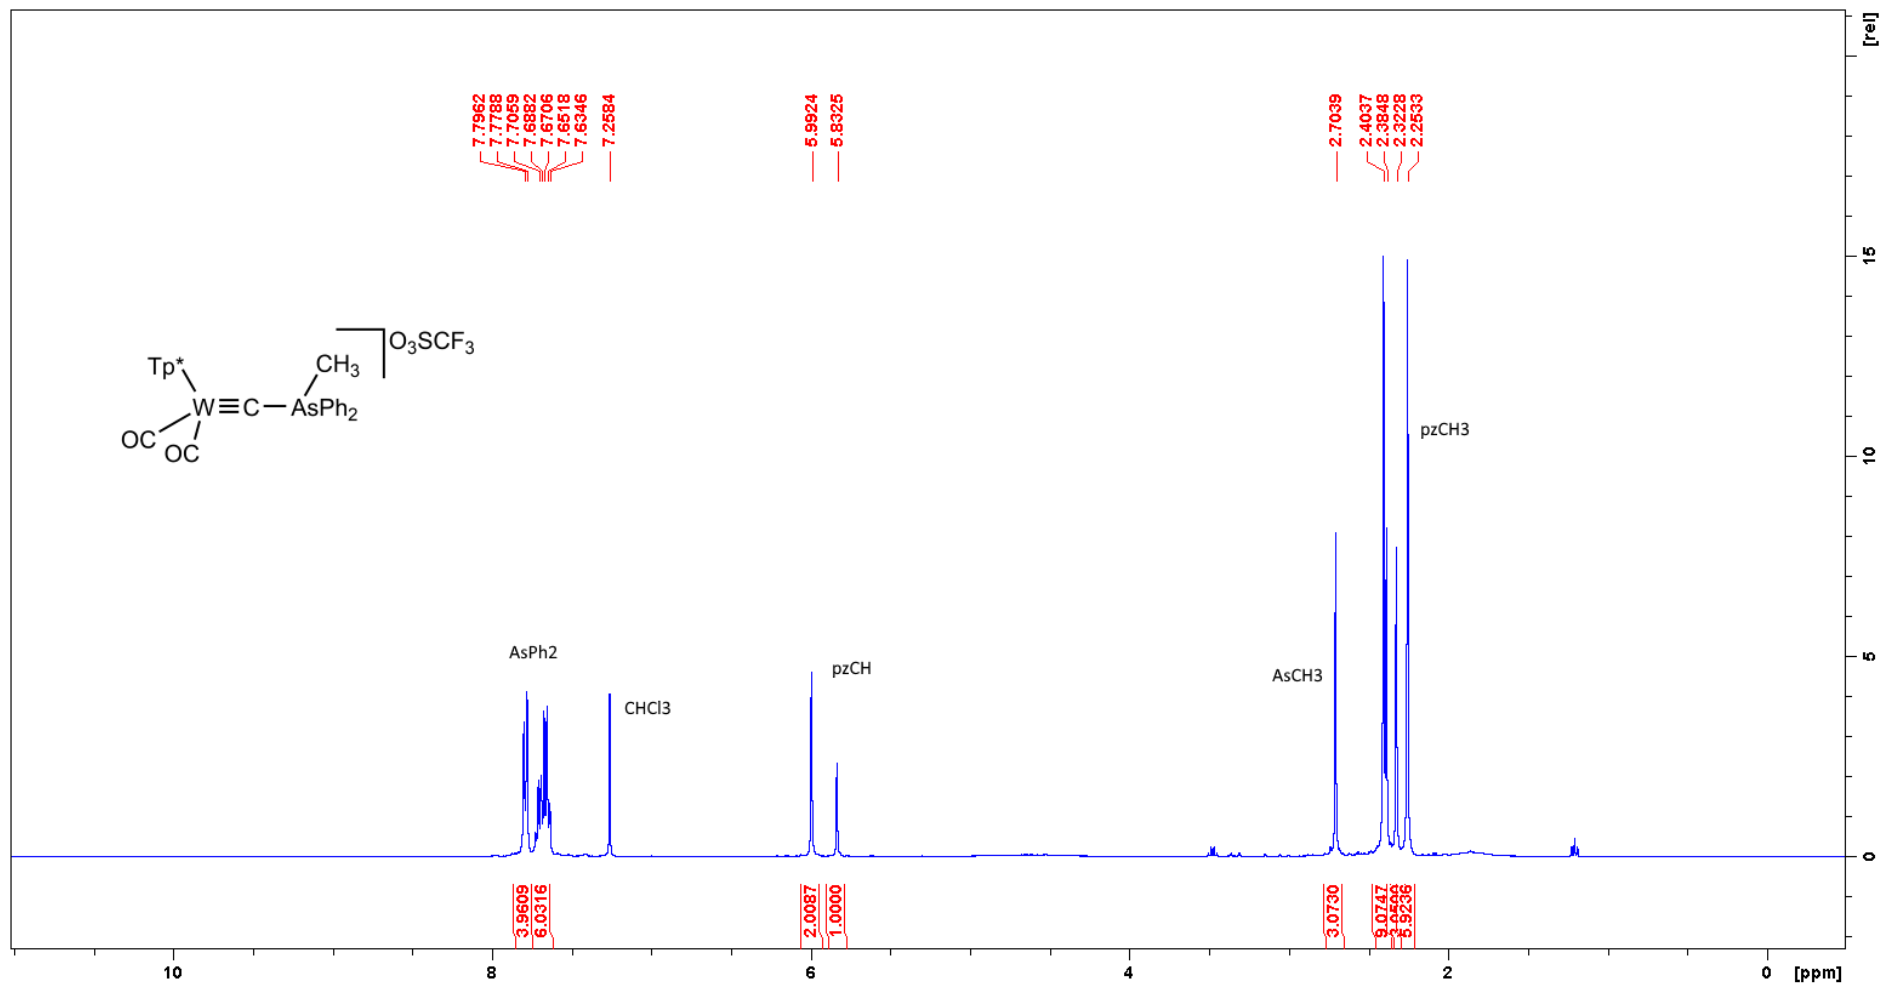

Figure S17.  $^1\text{H}$  NMR (600 MHz,  $\text{CDCl}_3$ , 25 °C,  $\delta$ ) of  $[\text{W}(\text{=CAsPh}_2\text{Me})(\text{CO})_2(\text{Tp}^*)]\text{O}_3\text{SCF}_3$   $[\text{6}]\text{O}_3\text{SCF}_3$ .

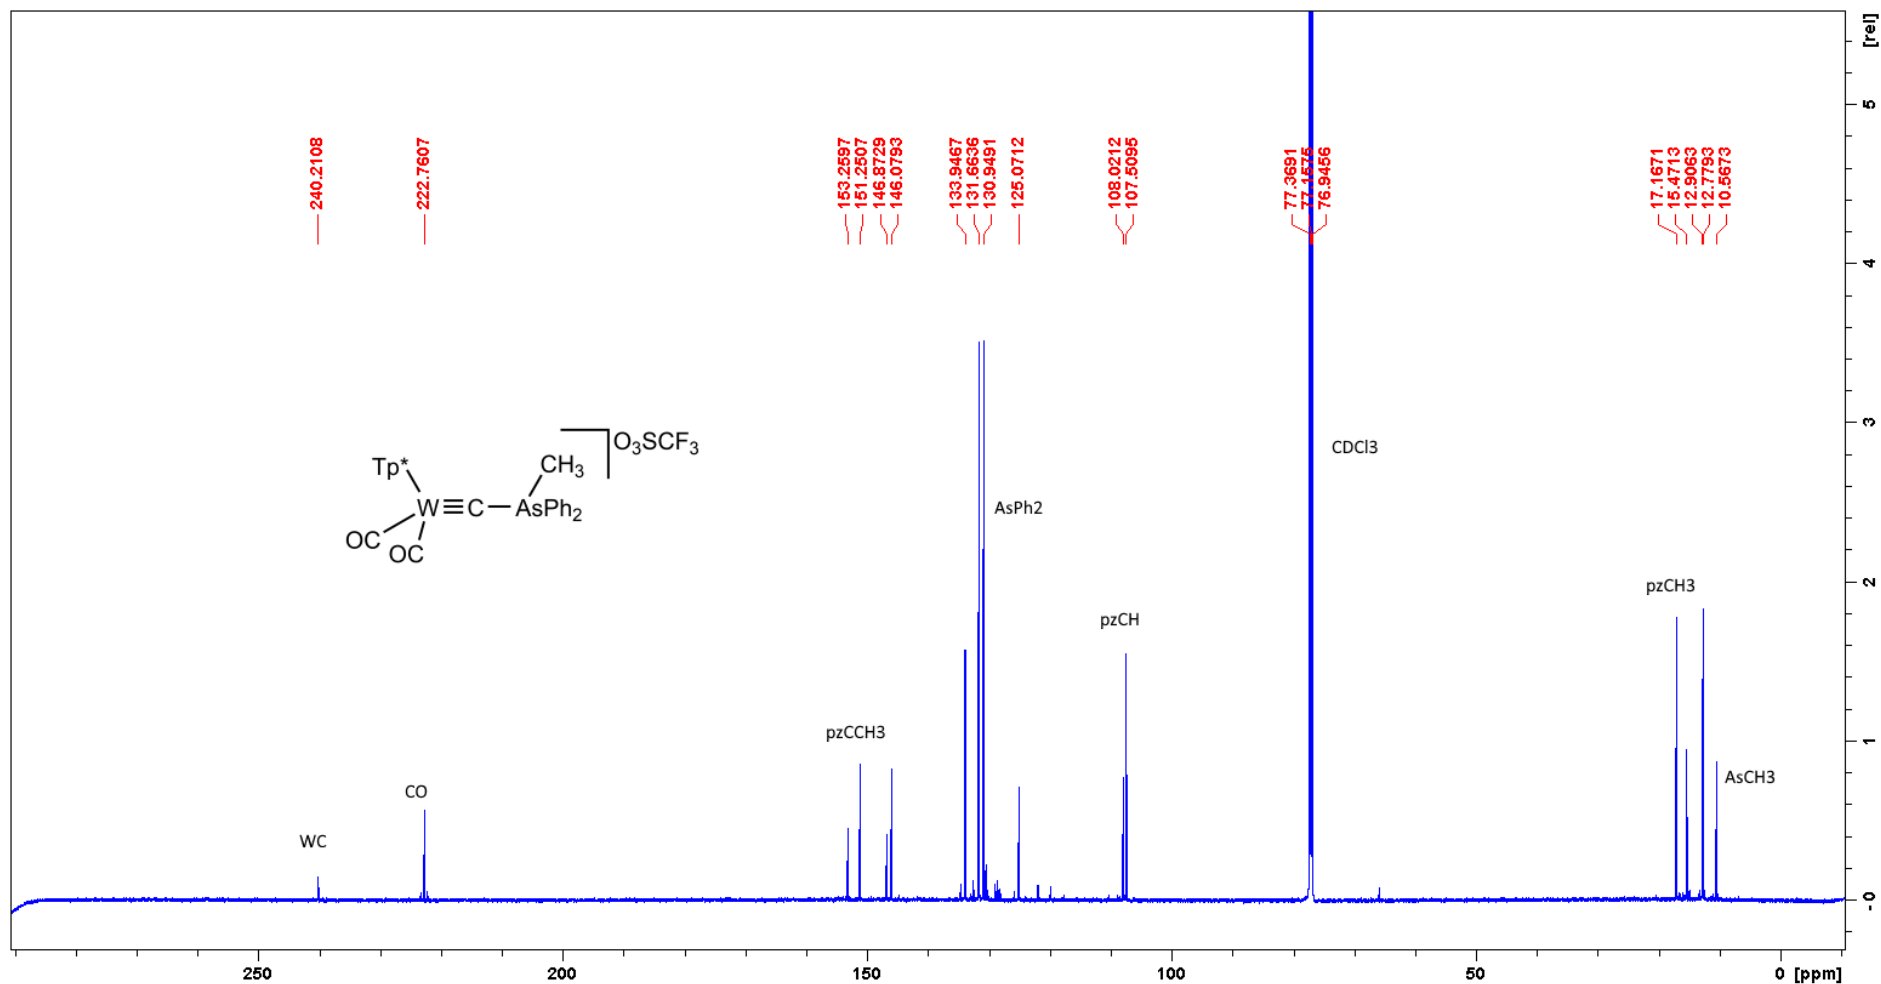

Figure S18.  $^{13}\text{C}\{^1\text{H}\}$  NMR (151 MHz,  $\text{CDCl}_3$ , 25°C,  $\delta$ ) of  $[\text{W}(\equiv\text{CAsPh}_2\text{Me})(\text{CO})_2(\text{Tp}^*)]\text{O}_3\text{SCF}_3 \cdot 6[\text{O}_3\text{SCF}_3]$ .

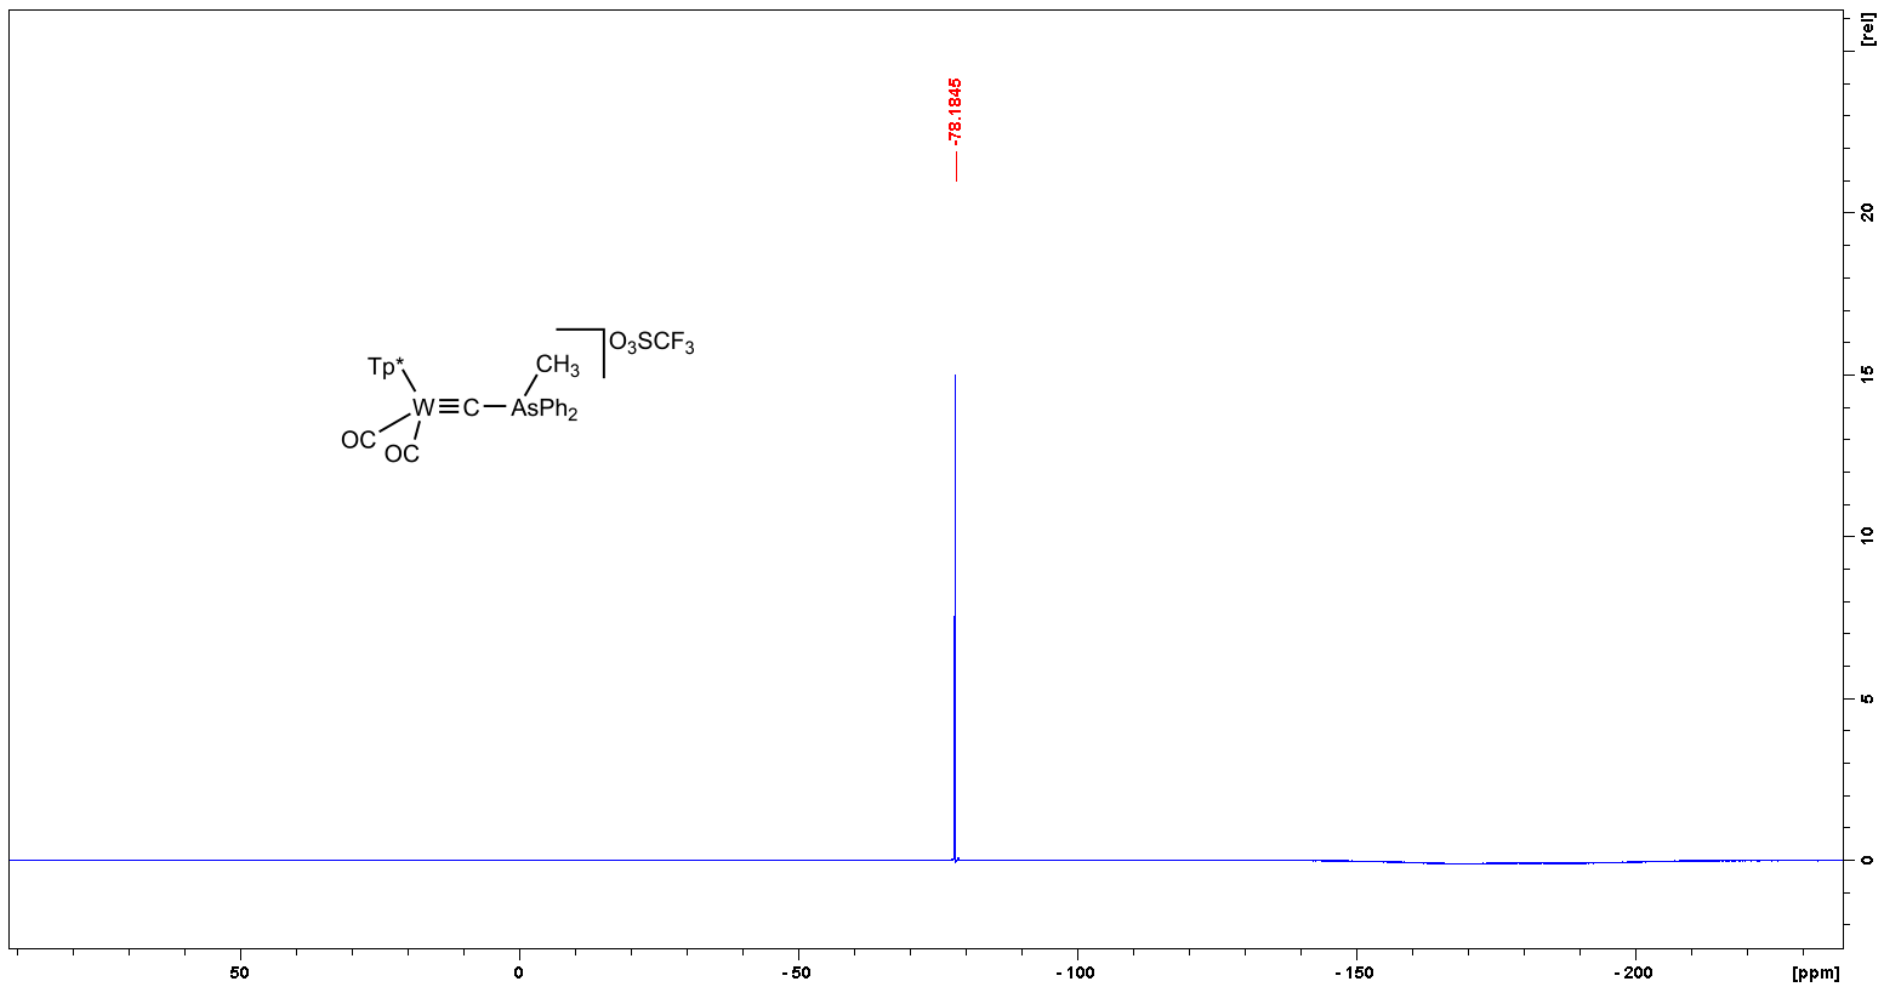

Figure S19.  $^{19}\text{F}\{^1\text{H}\}$  NMR (376 MHz,  $\text{CDCl}_3$ , 25°C,  $\delta$ ) of  $[\text{W}(\equiv\text{CAsPh}_2\text{Me})(\text{CO})_2(\text{Tp}^*)]\text{O}_3\text{SCF}_3 \cdot 6[\text{O}_3\text{SCF}_3]$ .



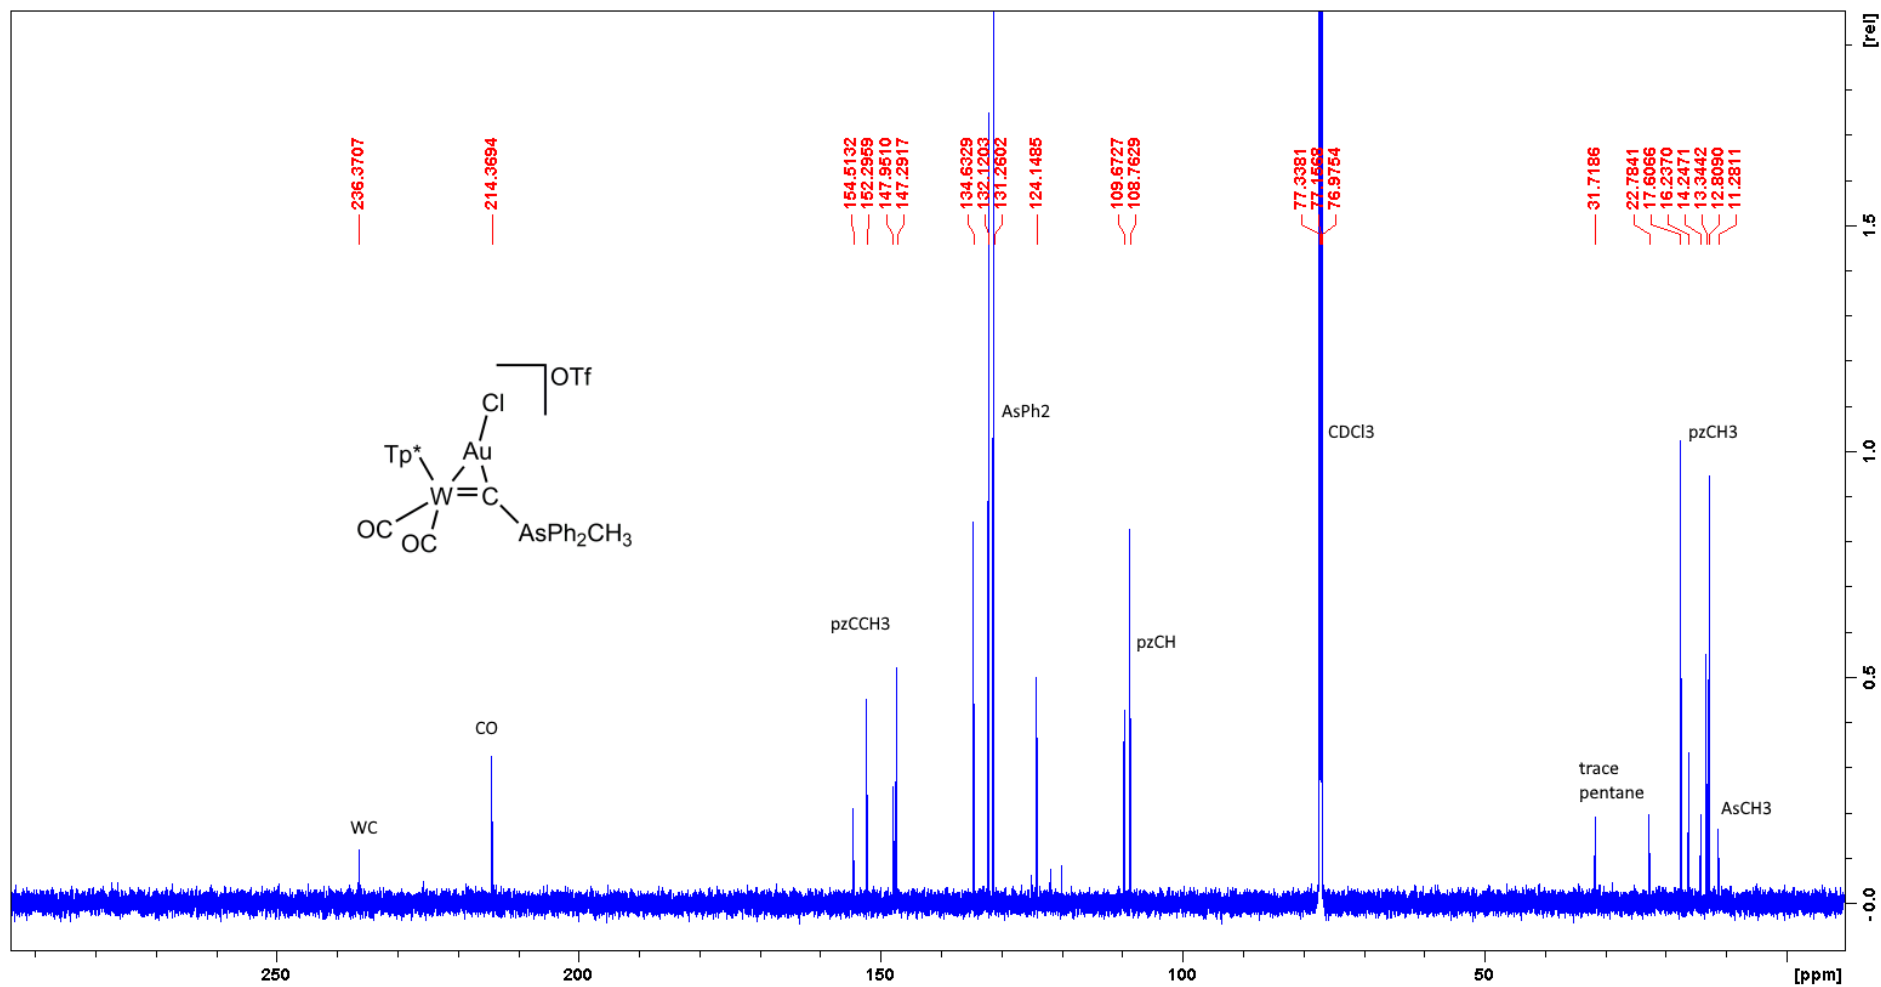

Figure S21.  $^{13}\text{C}\{^1\text{H}\}$  NMR (176 MHz,  $\text{CDCl}_3$ , 25°C,  $\delta$ ) of  $[\text{WAu}(\mu\text{-CAsPh}_2\text{Me})\text{Cl}(\text{CO})_2(\text{Tp}^*)]\text{O}_3\text{SCF}_3$  [7] $\text{O}_3\text{SCF}_3$ .

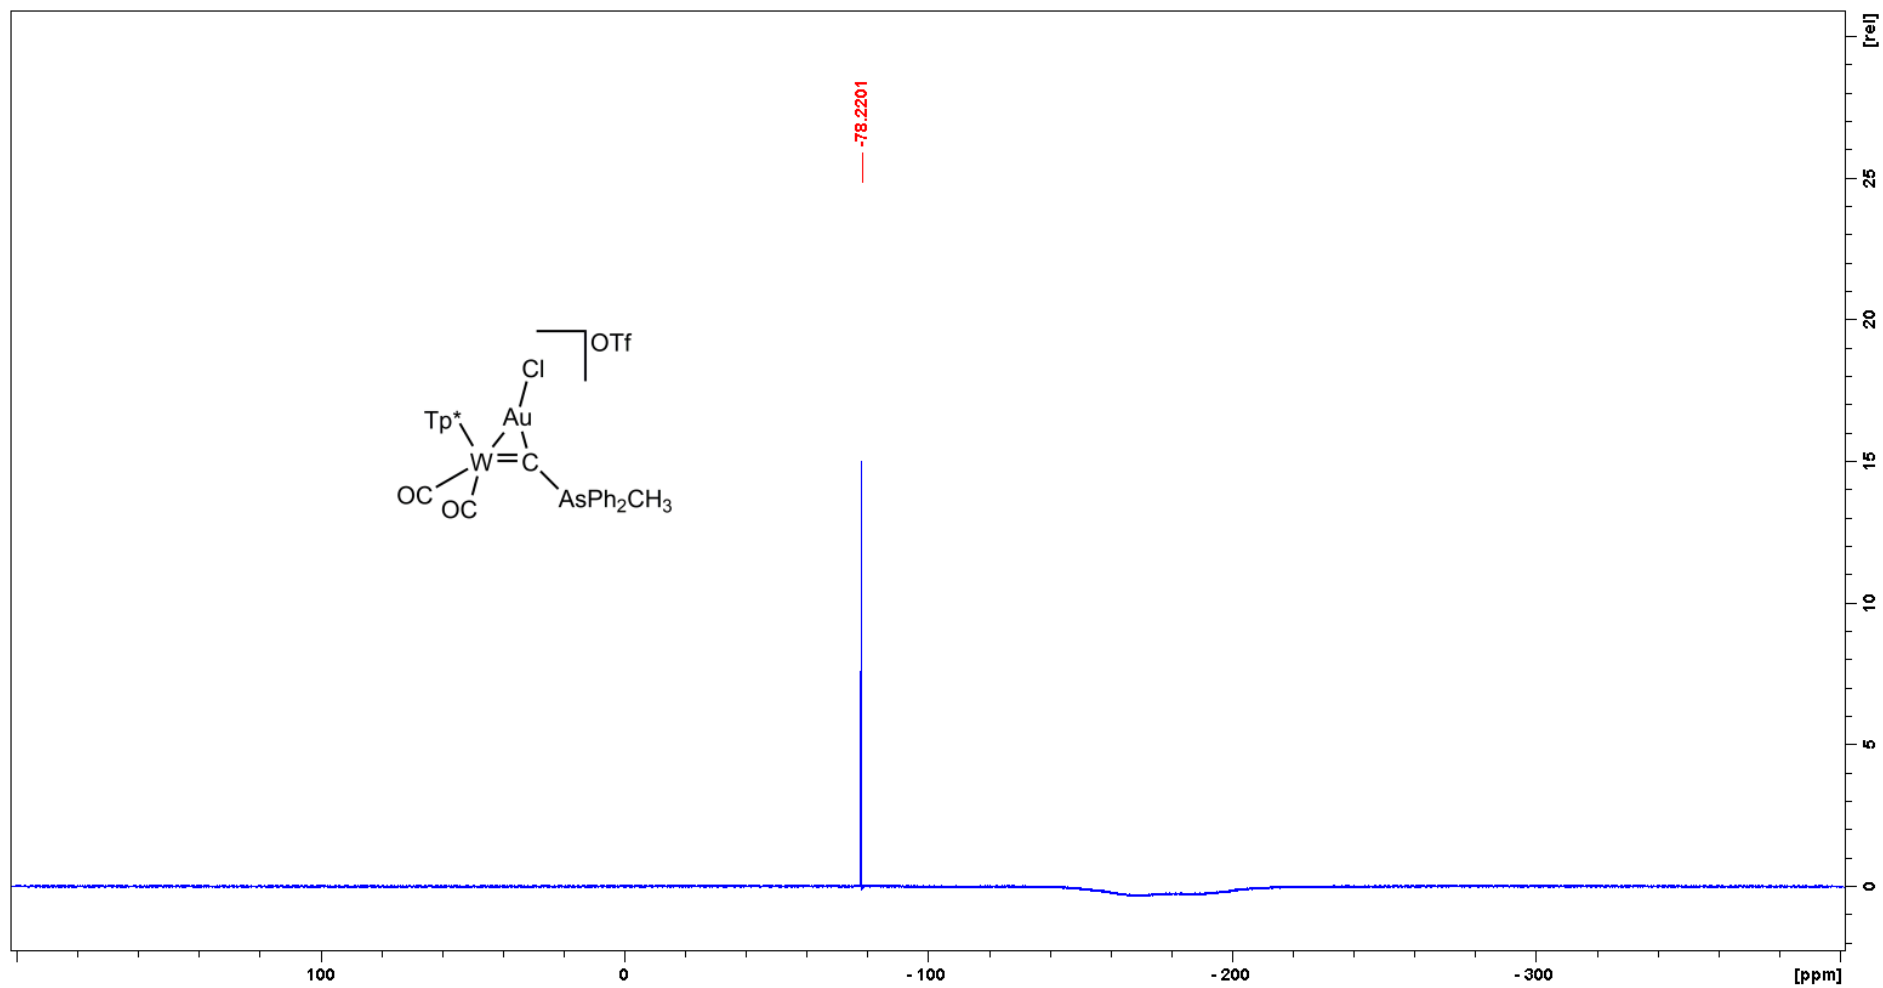

Figure S22.  $^{19}\text{F}\{^1\text{H}\}$  NMR (376 MHz,  $\text{CDCl}_3$ , 25°C,  $\delta$ )  $[\text{WAu}(\mu\text{-CAsPh}_2\text{Me})\text{Cl}(\text{CO})_2(\text{Tp}^*)]\text{O}_3\text{SCF}_3 \cdot 7\text{O}_3\text{SCF}_3$ .

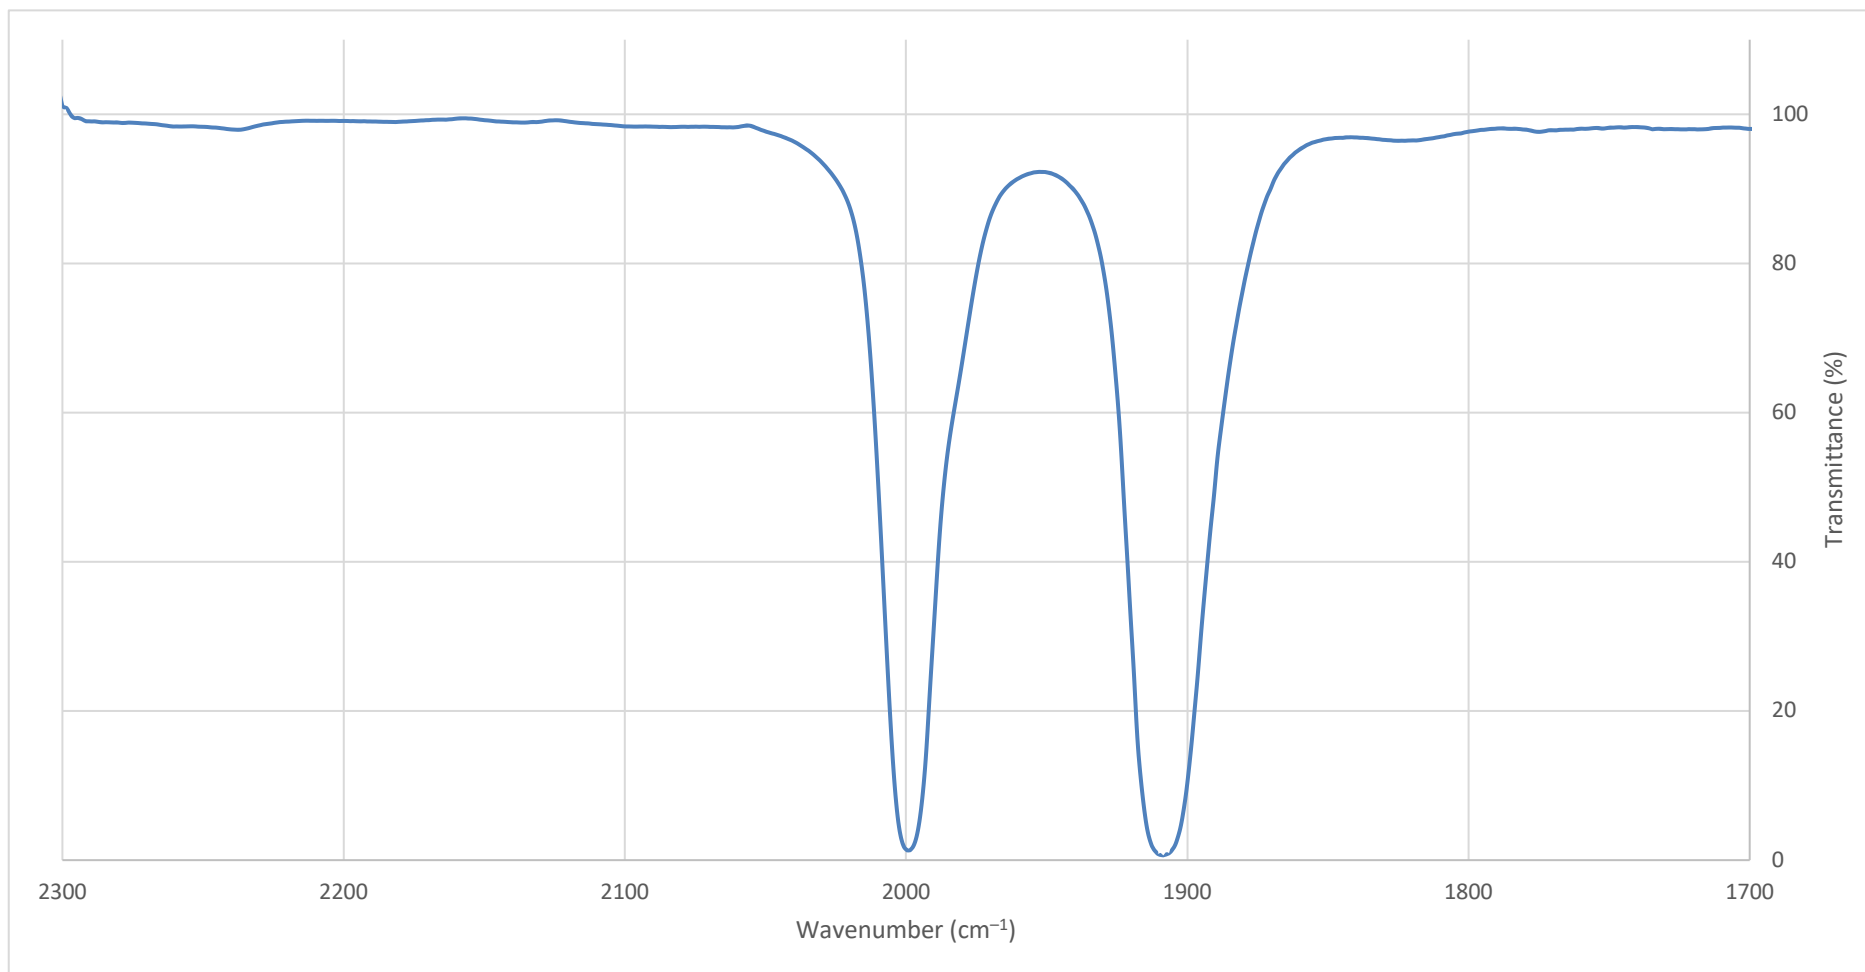

**Figure S23.** Infrared spectrum (CH<sub>2</sub>Cl<sub>2</sub>, cm<sup>-1</sup>) of [W{≡CAsPh<sub>2</sub>OsCl<sub>2</sub>(*p*-cymene)}(CO)<sub>2</sub>(Tp\*)] (**2**).

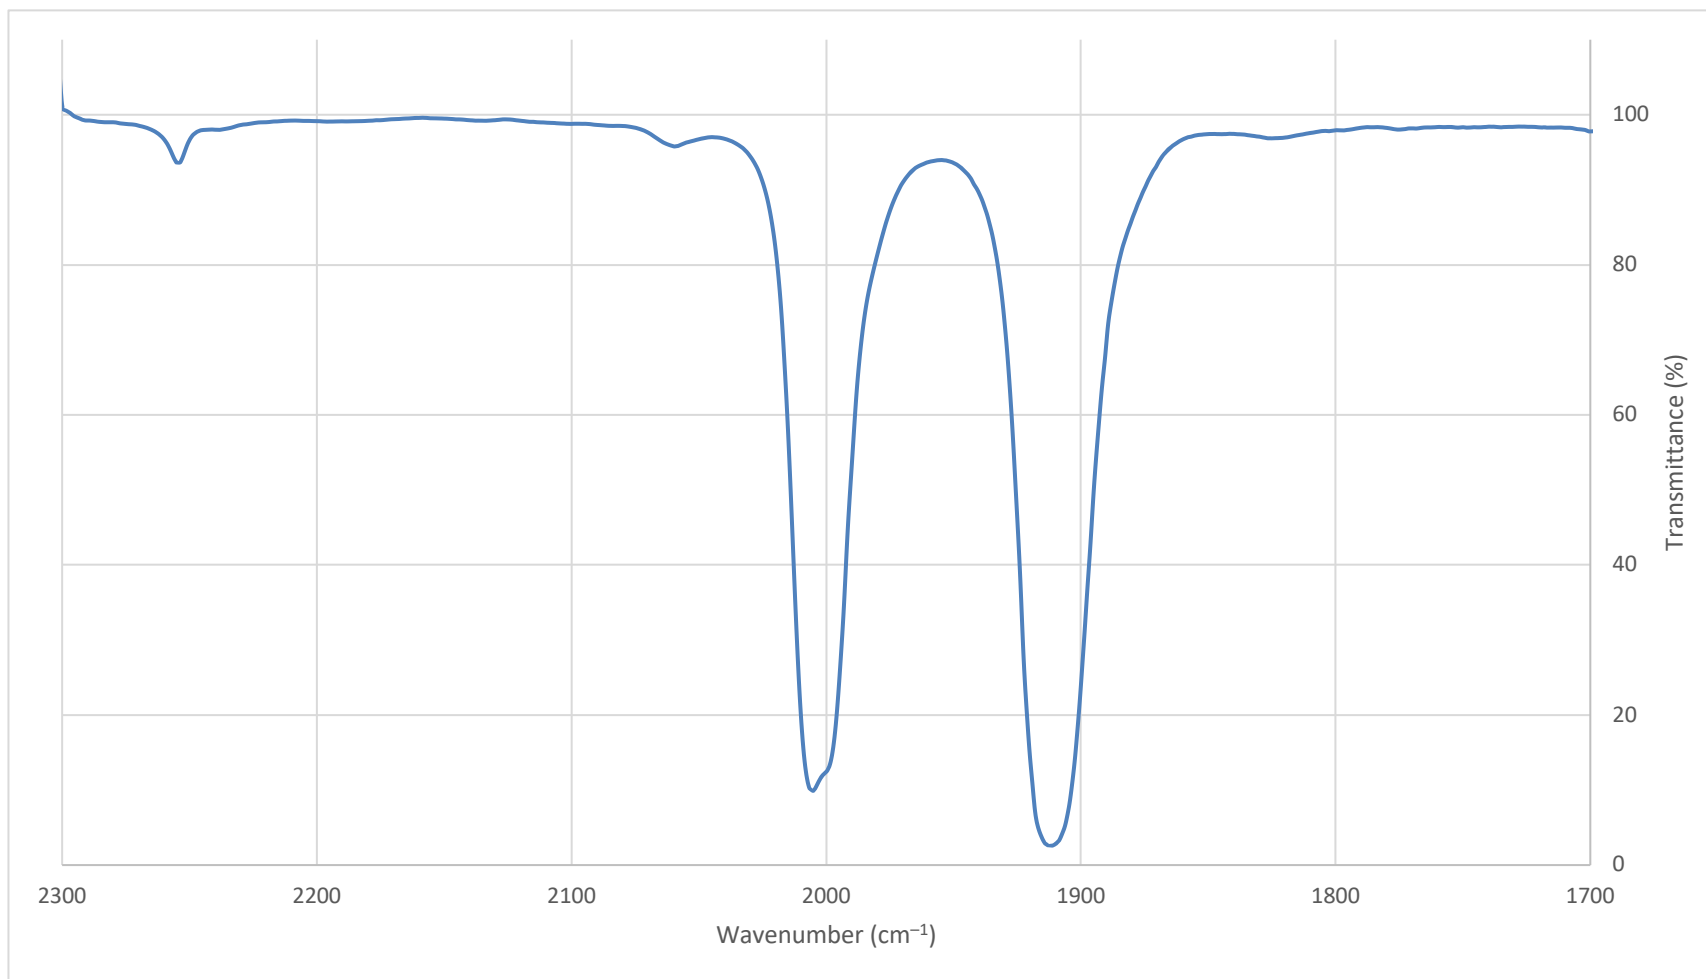

**Figure S24.** Infrared spectrum ( $\text{CH}_2\text{Cl}_2$ ,  $\text{cm}^{-1}$ ) of  $[\text{W}(\text{=CAsPh}_2\text{IrCl}_2\text{Cp}^*)(\text{CO})_2(\text{Tp}^*)]$  (**3**).



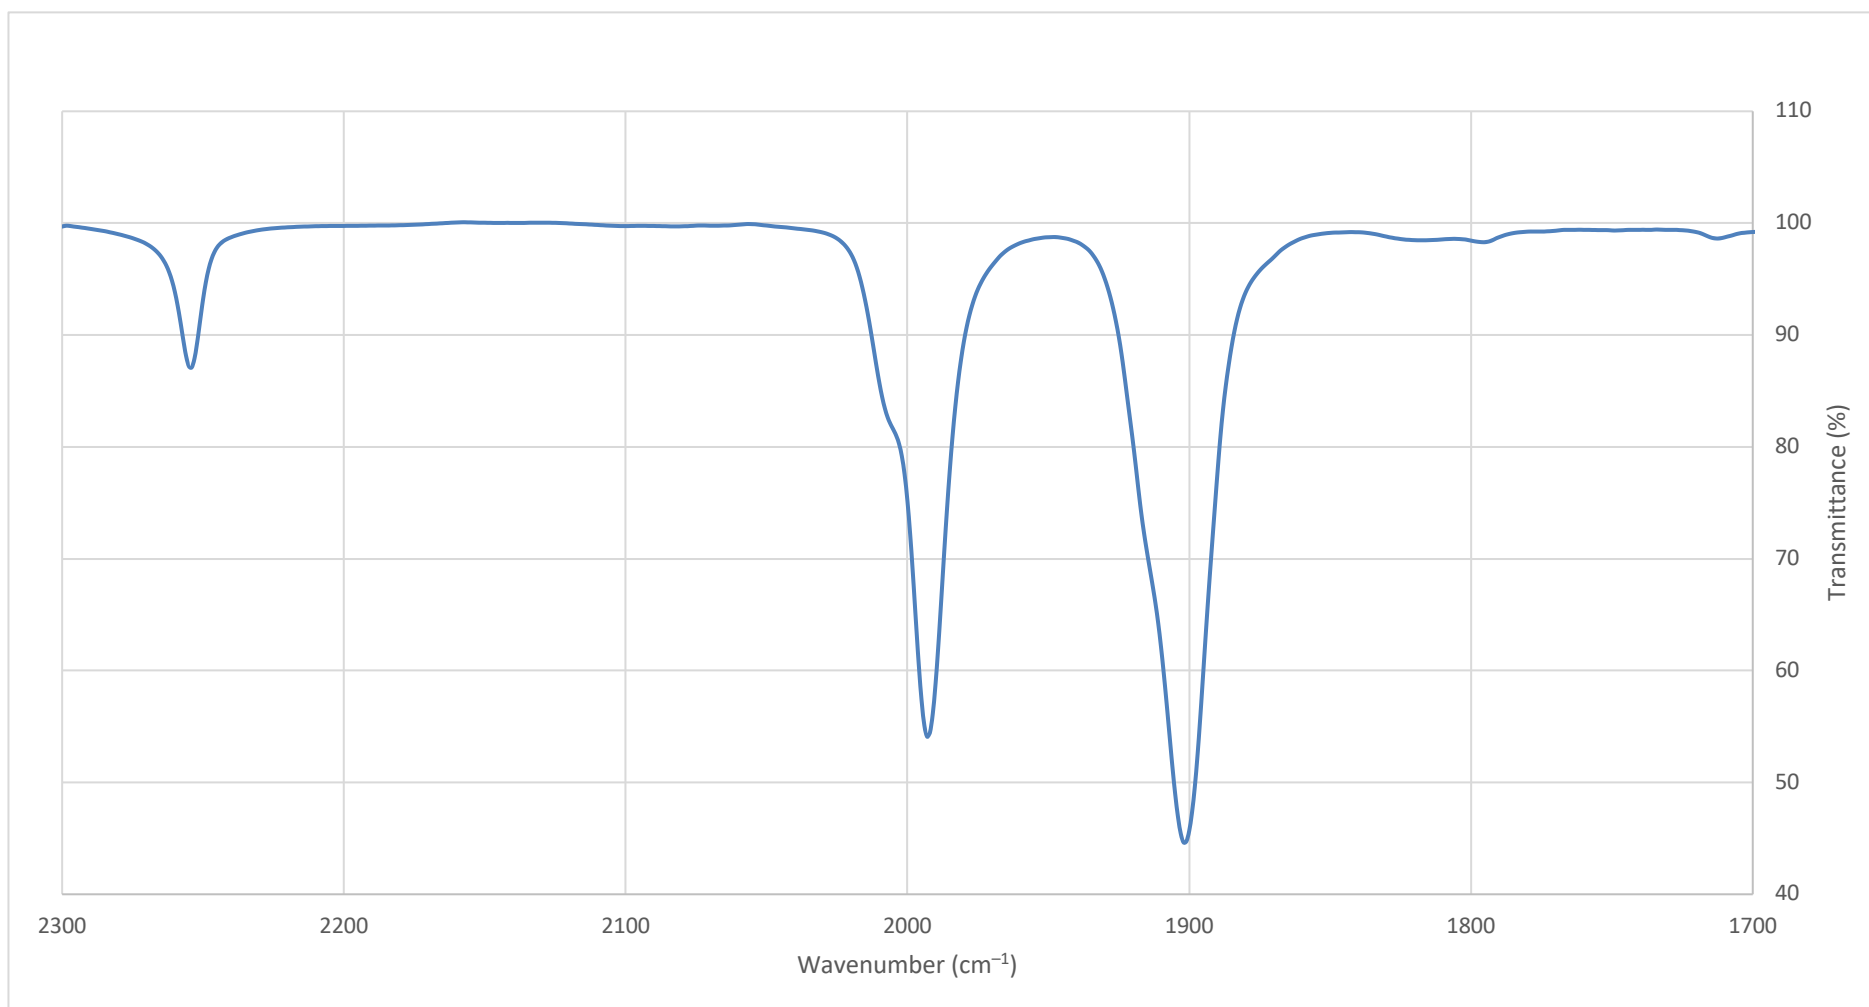

Figure S25. Infrared spectrum ( $CH_2Cl_2$ ,  $cm^{-1}$ ) of  $[trans-\{(Tp^*)(CO)_2W\equiv CAsPh_2\}_2PtCl_2]$  (4a).

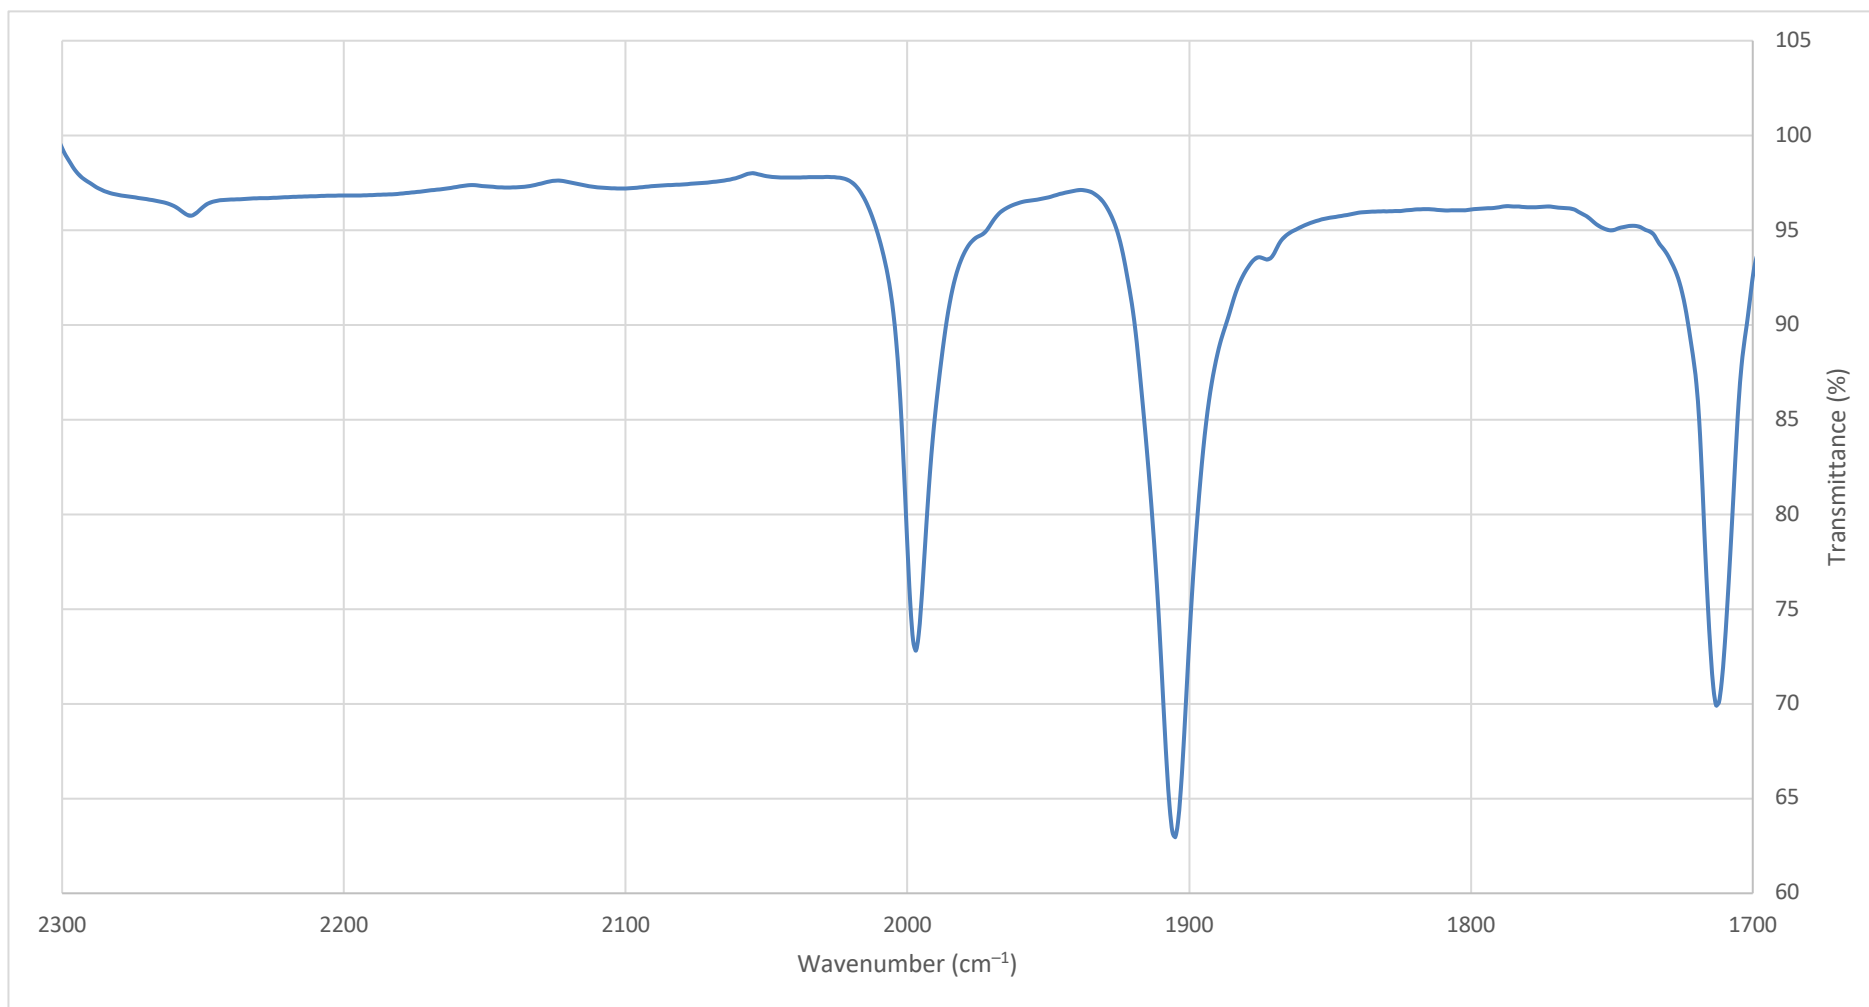

**Figure S26.** Infrared spectrum ( $CH_2Cl_2$ ,  $cm^{-1}$ ) of  $[cis-((Tp^*)(CO)_2W\equiv CAsPh_2)_2PtCl_2]$  (**4b**).

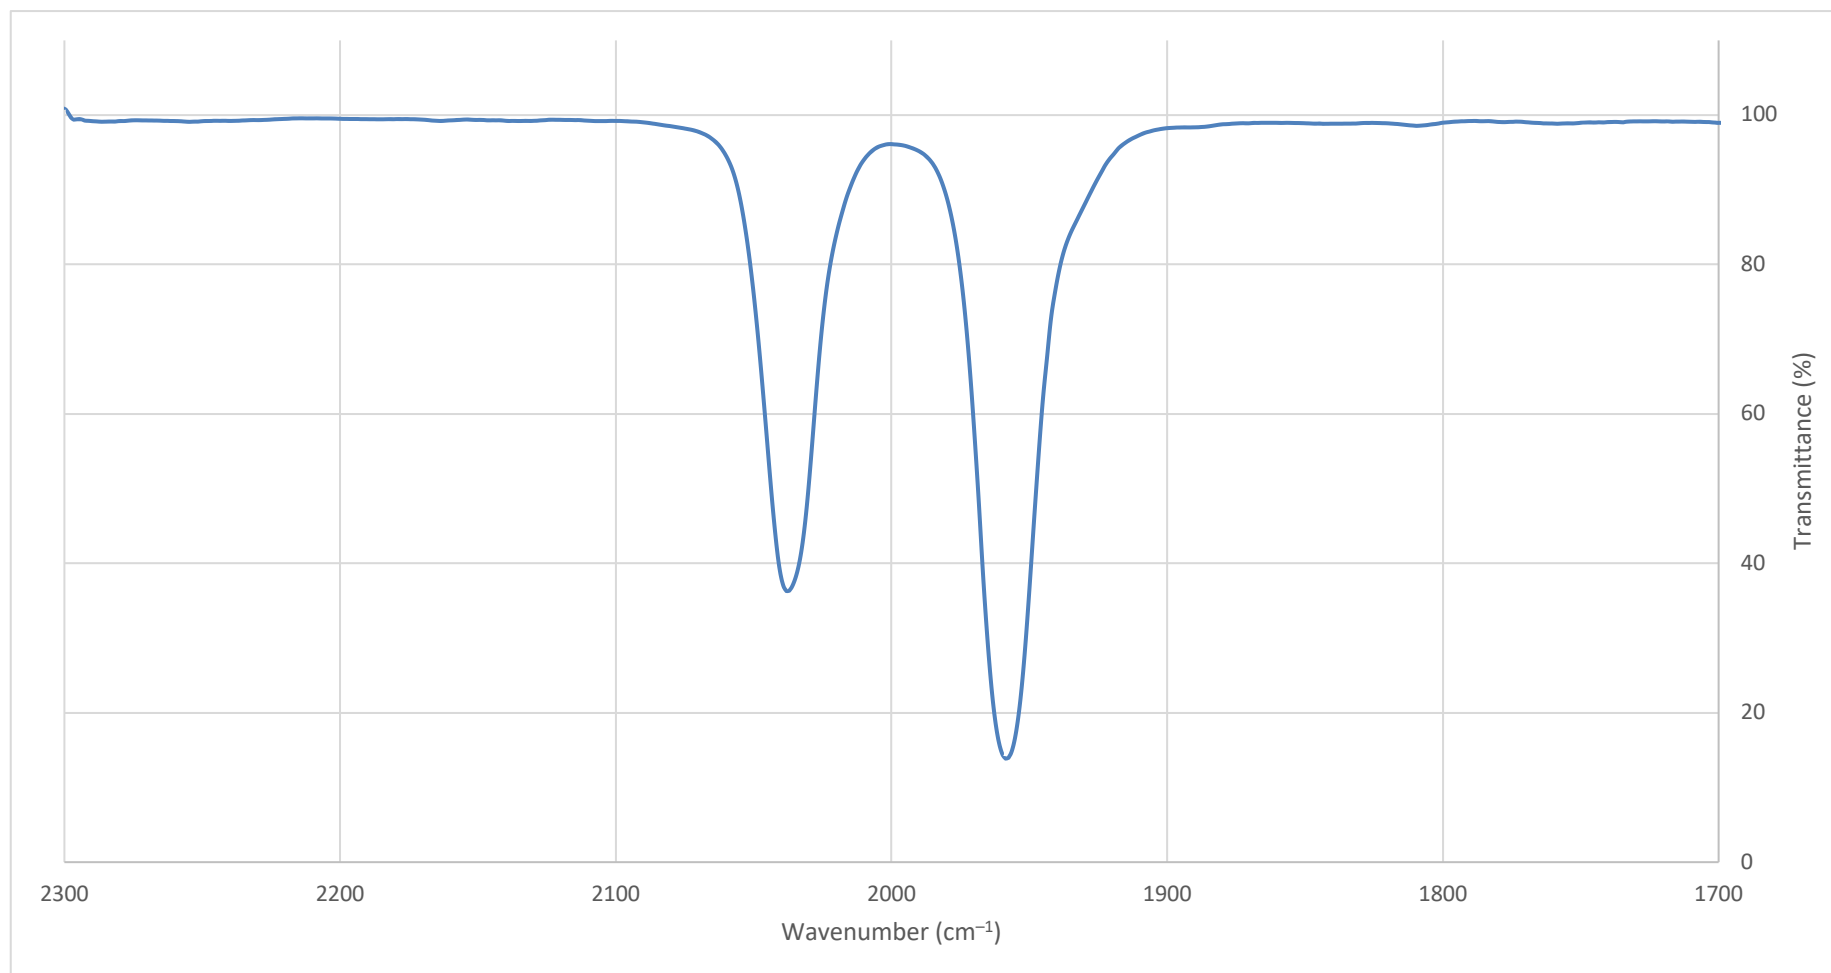

**Figure S27.** Infrared spectrum (CH<sub>2</sub>Cl<sub>2</sub>, cm<sup>-1</sup>) of [WAu(μ-CAsPh<sub>2</sub>{AuCl})Cl(CO)<sub>2</sub>(Tp\*)] (5).

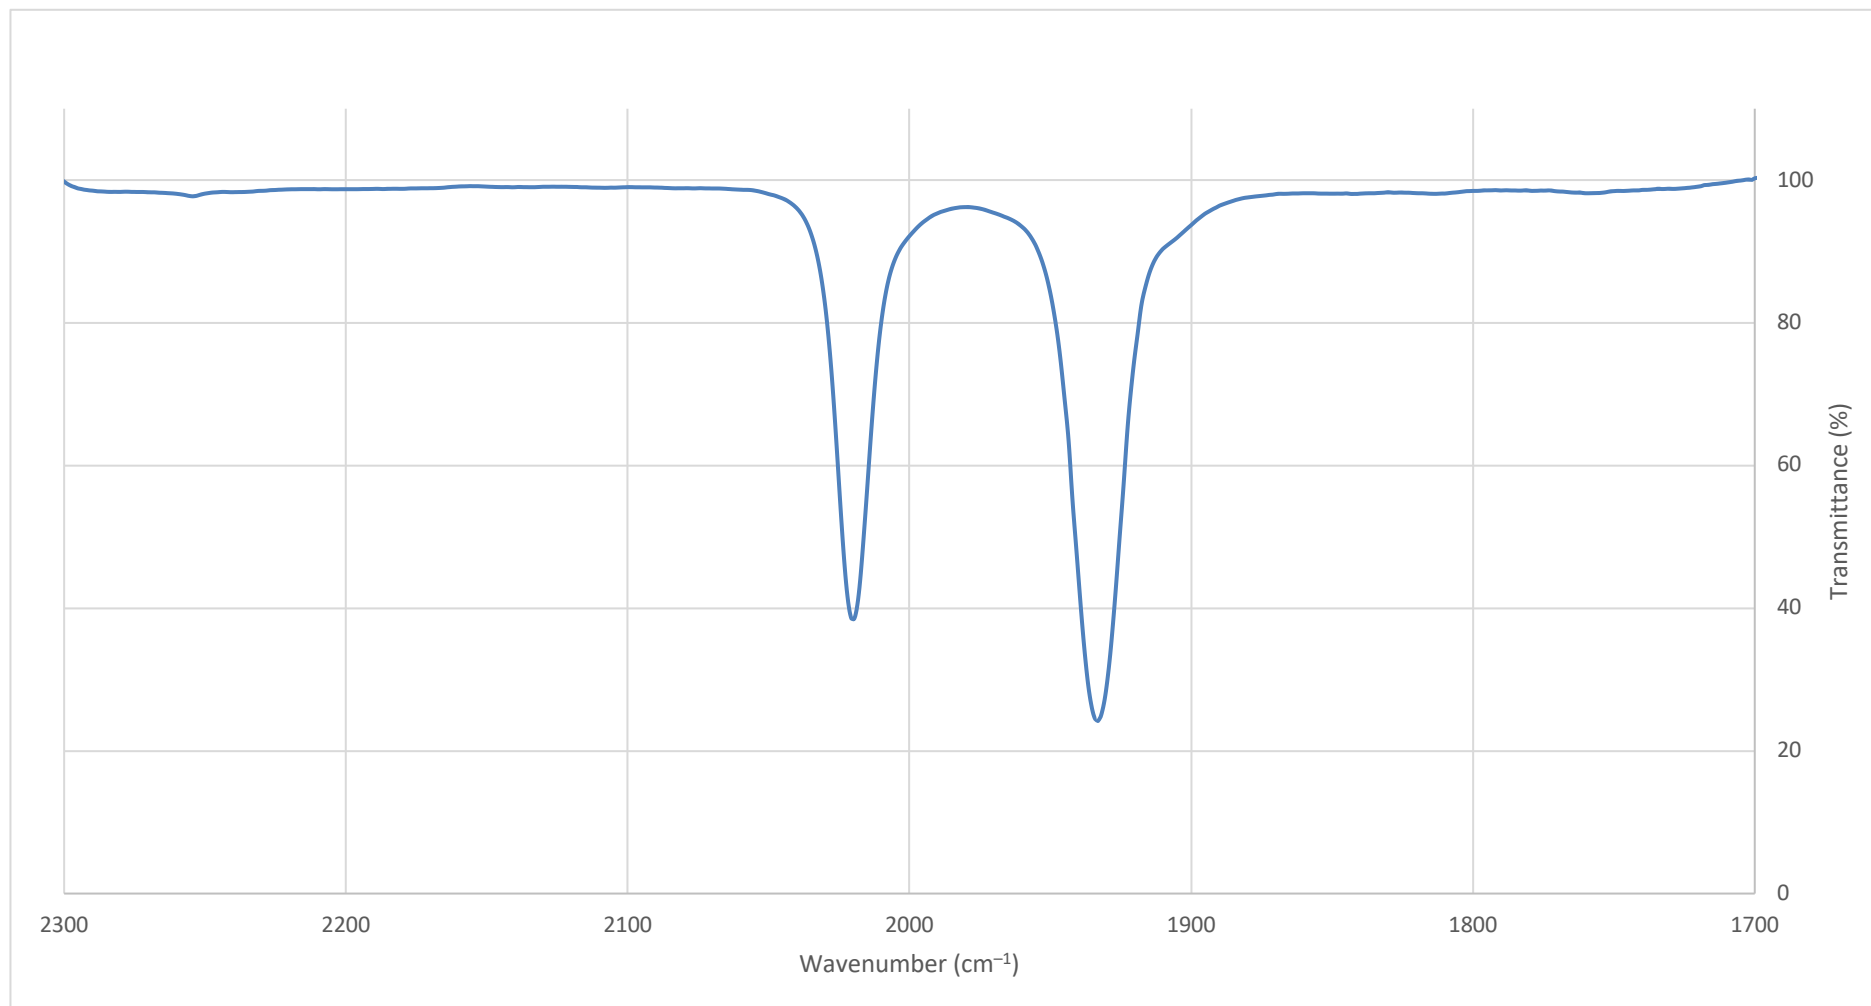

**Figure S28.** Infrared spectrum ( $\text{CH}_2\text{Cl}_2$ ,  $\text{cm}^{-1}$ ) of  $[\text{W}(\text{=CAsPh}_2\text{Me})(\text{CO})_2(\text{Tp}^*)]\text{O}_3\text{SCF}_3 \cdot 6[\text{O}_3\text{SCF}_3]$ .

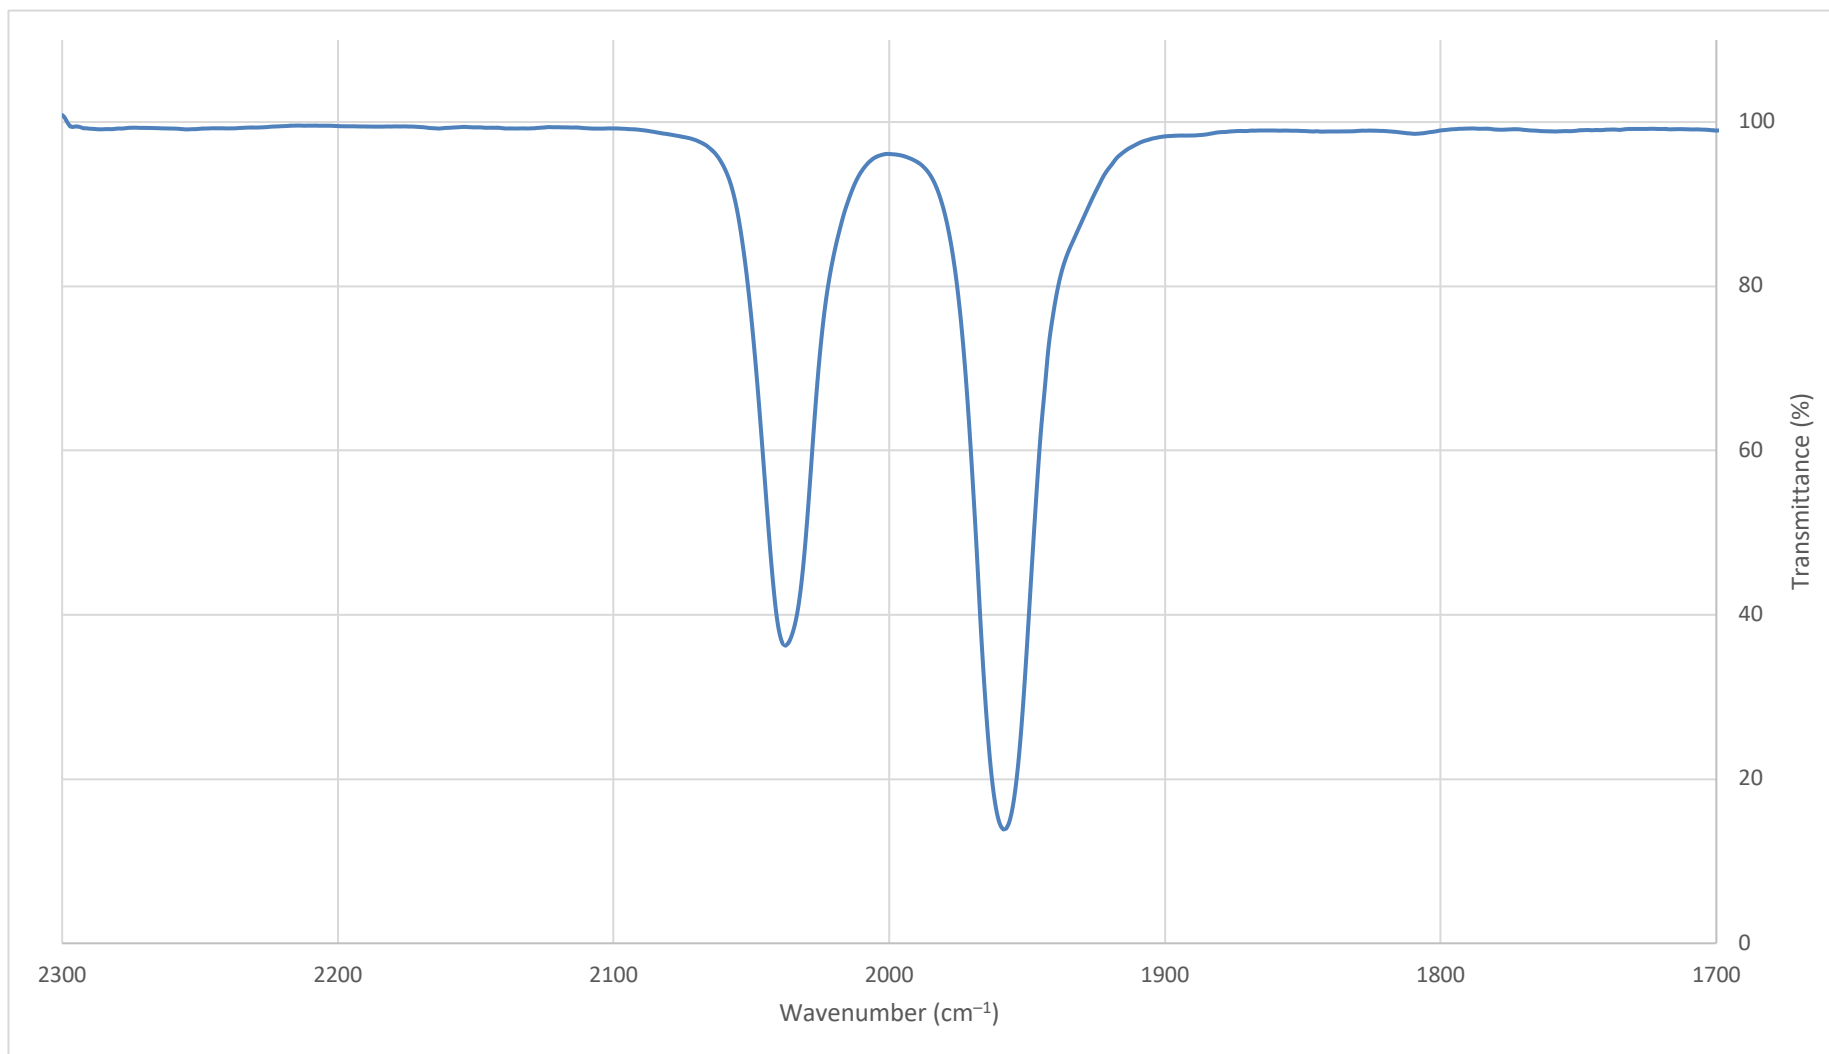

**Figure S29.** Infrared spectrum (CH<sub>2</sub>Cl<sub>2</sub>, cm<sup>-1</sup>) of [WAu(μ-CAsPh<sub>2</sub>Me)Cl(CO)<sub>2</sub>(Tp\*)]O<sub>3</sub>SCF<sub>3</sub> [7]O<sub>3</sub>SCF<sub>3</sub>.
